# Supplementary material
Source: publisher site journal article supplement (https://www.spandidos-publications.com/5893/downloadSupplementary)
Supplement: Supplementary file 1 [file downloadSupplementary]

## Sheet: DEPP(MISCD~SO)
Table SIV. Differentially expressed phosphorylated proteins among experimental groups and controls.
Protein-ID	p	FC	Gene-ID	Protein names
Q6ZWY9	3.29877e-05	3.04446	H2bc4	H2B clustered histone 4(H2bc4)
P47738	9.56359e-05	2.90405	Aldh2	aldehyde dehydrogenase 2, mitochondrial(Aldh2)
P07758	6.34727e-05	2.90352	Serpina1a	serine (or cysteine) peptidase inhibitor, clade A, member 1A(Serpina1a)
P02088	5.62618e-06	2.78695	Hbb-b1	hemoglobin, beta adult major chain(Hbb-b1)
Q9CXV1	0.000694356	2.46273	Sdhd	succinate dehydrogenase complex, subunit D, integral membrane protein(Sdhd)
P01942	2.73793e-06	2.39538	Hba-a1	hemoglobin alpha, adult chain 1(Hba-a1)
Q9D7B6	4.70415e-05	2.31993	Acad8	acyl-Coenzyme A dehydrogenase family, member 8(Acad8)
P56375	0.00589136	2.25878	Acyp2	acylphosphatase 2, muscle type(Acyp2)
P46425	0.0183094	2.0215	Gstp2	glutathione S-transferase, pi 2(Gstp2)
P62897	8.88064e-05	2.01039	Cycs	cytochrome c, somatic(Cycs)
Q8CAQ8	0.000530378	2.00933	Immt	inner membrane protein, mitochondrial(Immt)
O08528	0.00547069	1.98759	Hk2	hexokinase 2(Hk2)
P34884	0.0211386	1.94766	Mif	macrophage migration inhibitory factor (glycosylation-inhibiting factor)(Mif)
O08709	0.0102435	1.94687	Prdx6	peroxiredoxin 6(Prdx6)
P07724	5.63368e-07	1.92604	Alb	albumin(Alb)
P60843	0.000537849	1.91562	Eif4a1	eukaryotic translation initiation factor 4A1(Eif4a1)
P09542	6.69215e-07	1.89742	Myl3	myosin, light polypeptide 3(Myl3)
Q99KR7	0.000566106	1.86688	Ppif	peptidylprolyl isomerase F (cyclophilin F)(Ppif)
P05064	0.000221705	1.86122	Aldoa	aldolase A, fructose-bisphosphate(Aldoa)
Q9JLZ3	0.000374012	1.85984	Auh	AU RNA binding protein/enoyl-coenzyme A hydratase(Auh)
Q8R1Q8	0.0157757	1.81106	Dync1li1	dynein cytoplasmic 1 light intermediate chain 1(Dync1li1)
Q921I1	1.52535e-11	1.8058	Trf	transferrin(Trf)
P52503	0.0364208	1.79373	Ndufs6	NADH:ubiquinone oxidoreductase core subunit S6(Ndufs6)
Q60597	0.000431784	1.77122	Ogdh	oxoglutarate (alpha-ketoglutarate) dehydrogenase (lipoamide)(Ogdh)
P18242	0.00098538	1.75971	Ctsd	cathepsin D(Ctsd)
Q9D0S9	0.000111082	1.74963	Hint2	histidine triad nucleotide binding protein 2(Hint2)
Q9QY76	0.0211517	1.73248	Vapb	vesicle-associated membrane protein, associated protein B and C(Vapb)
Q9JI91	6.40378e-05	1.72534	Actn2	actinin alpha 2(Actn2)
P54071	0.0136492	1.72292	Idh2	isocitrate dehydrogenase 2 (NADP+), mitochondrial(Idh2)
Q8BSY0	0.0163835	1.6788	Asph	aspartate-beta-hydroxylase(Asph)
Q9CQ69	0.00198547	1.67369	Uqcrq	ubiquinol-cytochrome c reductase, complex III subunit VII(Uqcrq)
Q9CQZ5	0.0149525	1.65388	Ndufa6	NADH:ubiquinone oxidoreductase subunit A6(Ndufa6)
Q9D0F9	0.0222196	1.62718	Pgm1	phosphoglucomutase 1(Pgm1)
P21107	1.14653e-08	1.61533	Tpm3	tropomyosin 3, gamma(Tpm3)
P51667	0.000312731	1.61492	Myl2	myosin, light polypeptide 2, regulatory, cardiac, slow(Myl2)
Q7TMD7	0.0023248	1.61394	Dsg4	desmoglein 4(Dsg4)
Q01768	1.33668e-05	1.61307	Nme2	NME/NM23 nucleoside diphosphate kinase 2(Nme2)
Q9Z1P6	0.0167281	1.60881	Ndufa7	NADH:ubiquinone oxidoreductase subunit A7(Ndufa7)
Q9CPQ8	1.31655e-05	1.58728	Atp5l	ATP synthase, H+ transporting, mitochondrial F0 complex, subunit G(Atp5l)
Q8BWF0	0.00197791	1.58322	Aldh5a1	aldhehyde dehydrogenase family 5, subfamily A1(Aldh5a1)
Q9CR21	0.0195976	1.58157	Ndufab1	NADH:ubiquinone oxidoreductase subunit AB1(Ndufab1)
Q9CPQ1	0.000572907	1.58012	Cox6c	cytochrome c oxidase subunit 6C(Cox6c)
P62631	0.000761107	1.56524	Eef1a2	eukaryotic translation elongation factor 1 alpha 2(Eef1a2)
O35855	0.00123211	1.56521	Bcat2	branched chain aminotransferase 2, mitochondrial(Bcat2)
Q60930	0.00254489	1.56191	Vdac2	voltage-dependent anion channel 2(Vdac2)
P05202	3.87495e-07	1.55339	Got2	glutamatic-oxaloacetic transaminase 2, mitochondrial(Got2)
P68368	0.00993142	1.54819	Tuba4a	tubulin, alpha 4A(Tuba4a)
P07309	0.000156289	1.54196	Ttr	transthyretin(Ttr)
Q61171	0.0217242	1.53714	Prdx2	peroxiredoxin 2(Prdx2)
Q9D0K2	0.00363884	1.53641	Oxct1	3-oxoacid CoA transferase 1(Oxct1)
Q99LX0	0.00167418	1.53291	Park7	Parkinson disease (autosomal recessive, early onset) 7(Park7)
P63038	0.000450973	1.53232	Hspd1	heat shock protein 1 (chaperonin)(Hspd1)
Q8JZQ2	0.000124972	1.5285	Afg3l2	AFG3-like AAA ATPase 2(Afg3l2)
Q80XN0	0.000216759	1.52455	Bdh1	3-hydroxybutyrate dehydrogenase, type 1(Bdh1)
Q08857	0.000413083	1.52383	Cd36	CD36 molecule(Cd36)
Q99K70	6.31463e-05	1.52167	Rragc	Ras-related GTP binding C(Rragc)
P00405	0.000486438	1.52003	mt-Co2	cytochrome c oxidase II, mitochondrial(mt-Co2)
Q9WUM5	0.00122619	1.50735	Suclg1	succinate-CoA ligase, GDP-forming, alpha subunit(Suclg1)
Q60932	0.000135296	1.50657	Vdac1	voltage-dependent anion channel 1(Vdac1)
P35700	0.00881499	1.50636	Prdx1	peroxiredoxin 1(Prdx1)
P28650	0.0133158	1.50571	Adssl1	adenylosuccinate synthetase like 1(Adssl1)
P56135	0.00049487	1.5048	Atp5j2	ATP synthase, H+ transporting, mitochondrial F0 complex, subunit F2(Atp5j2)
P12787	0.000275214	1.50094	Cox5a	cytochrome c oxidase subunit 5A(Cox5a)
P09671	2.94959e-08	1.49718	Sod2	superoxide dismutase 2, mitochondrial(Sod2)
P52480	1.77036e-05	1.488	Pkm	pyruvate kinase, muscle(Pkm)
P56382	0.0108956	1.48591	Atp5e	ATP synthase, H+ transporting, mitochondrial F1 complex, epsilon subunit(Atp5e)
P84244	7.6554e-05	1.48459	H3f3a	H3.3 histone A(H3f3a)
Q9CQR4	0.00109207	1.48332	Acot13	acyl-CoA thioesterase 13(Acot13)
P16858	0.000184401	1.48306	Gapdh	glyceraldehyde-3-phosphate dehydrogenase(Gapdh)
Q9D2G2	0.000115193	1.48219	Dlst	dihydrolipoamide S-succinyltransferase (E2 component of 2-oxo-glutarate complex)(Dlst)
Q9CR62	0.00379809	1.4709	Slc25a11	solute carrier family 25 (mitochondrial carrier oxoglutarate carrier), member 11(Slc25a11)
Q8BH95	2.64173e-06	1.46691	Echs1	enoyl Coenzyme A hydratase, short chain, 1, mitochondrial(Echs1)
P51174	2.98906e-07	1.45778	Acadl	acyl-Coenzyme A dehydrogenase, long-chain(Acadl)
P05201	0.000586657	1.45759	Got1	glutamic-oxaloacetic transaminase 1, soluble(Got1)
Q60931	0.0024692	1.45169	Vdac3	voltage-dependent anion channel 3(Vdac3)
P08249	6.85048e-06	1.45163	Mdh2	malate dehydrogenase 2, NAD (mitochondrial)(Mdh2)
Q9DC70	0.00015976	1.45007	Ndufs7	NADH:ubiquinone oxidoreductase core subunit S7(Ndufs7)
Q61425	0.000158368	1.44925	Hadh	hydroxyacyl-Coenzyme A dehydrogenase(Hadh)
P51881	9.99445e-05	1.44849	Slc25a5	solute carrier family 25 (mitochondrial carrier, adenine nucleotide translocator), member 5(Slc25a5)
O55126	0.000239495	1.44692	Nipsnap2	nipsnap homolog 2(Nipsnap2)
P63030	0.0301881	1.44541	Mpc1	mitochondrial pyruvate carrier 1(Mpc1)
Q924X2	0.00264478	1.43914	Cpt1b	carnitine palmitoyltransferase 1b, muscle(Cpt1b)
Q8BK30	0.0245842	1.4347	Ndufv3	NADH:ubiquinone oxidoreductase core subunit V3(Ndufv3)
Q9CZU6	0.000534999	1.42936	Cs	citrate synthase(Cs)
P11404	0.000326358	1.4238	Fabp3	fatty acid binding protein 3, muscle and heart(Fabp3)
P41216	0.0057865	1.4226	Acsl1	acyl-CoA synthetase long-chain family member 1(Acsl1)
P58771	2.73804e-10	1.41861	Tpm1	tropomyosin 1, alpha(Tpm1)
Q99LC5	6.69552e-06	1.41145	Etfa	electron transferring flavoprotein, alpha polypeptide(Etfa)
Q64433	0.000201484	1.40577	Hspe1	heat shock protein 1 (chaperonin 10)(Hspe1)
P03930	0.000124386	1.40221	mt-Atp8	ATP synthase 8, mitochondrial(mt-Atp8)
O70373	0.00379824	1.39673	Xirp1	xin actin-binding repeat containing 1(Xirp1)
P16125	0.000166461	1.39357	Ldhb	lactate dehydrogenase B(Ldhb)
Q60994	0.0398365	1.39246	Adipoq	adiponectin, C1Q and collagen domain containing(Adipoq)
Q8BMF4	0.000112506	1.39141	Dlat	dihydrolipoamide S-acetyltransferase (E2 component of pyruvate dehydrogenase complex)(Dlat)
Q61207	0.0002297	1.39096	Psap	prosaposin(Psap)
Q8BGK2	0.0155899	1.38817	Adprhl1	ADP-ribosylhydrolase like 1(Adprhl1)
P47757	0.0143058	1.38487	Capzb	capping protein (actin filament) muscle Z-line, beta(Capzb)
Q9CPP6	0.0164733	1.38334	Ndufa5	NADH:ubiquinone oxidoreductase subunit A5(Ndufa5)
P42125	0.000220601	1.36922	Eci1	enoyl-Coenzyme A delta isomerase 1(Eci1)
Q9CQZ6	0.00247998	1.36857	Ndufb3	NADH:ubiquinone oxidoreductase subunit B3(Ndufb3)
Q9CQQ7	0.00096097	1.36558	Atp5pb	ATP synthase peripheral stalk-membrane subunit b(Atp5pb)
P50752	5.69562e-08	1.35955	Tnnt2	troponin T2, cardiac(Tnnt2)
Q9D6R2	4.03755e-06	1.34949	Idh3a	isocitrate dehydrogenase 3 (NAD+) alpha(Idh3a)
Q9EQ20	0.00138927	1.3488	Aldh6a1	aldehyde dehydrogenase family 6, subfamily A1(Aldh6a1)
Q9WTP6	0.00338649	1.3482	Ak2	adenylate kinase 2(Ak2)
Q99KI0	3.18725e-05	1.34675	Aco2	aconitase 2, mitochondrial(Aco2)
Q9CQA3	0.000246024	1.3467	Sdhb	succinate dehydrogenase complex, subunit B, iron sulfur (Ip)(Sdhb)
O35459	5.29482e-06	1.34476	Ech1	enoyl coenzyme A hydratase 1, peroxisomal(Ech1)
Q9DB20	0.00273659	1.34457	Atp5o	ATP synthase, H+ transporting, mitochondrial F1 complex, O subunit(Atp5o)
Q3ULD5	0.0444425	1.3389	Mccc2	methylcrotonoyl-Coenzyme A carboxylase 2 (beta)(Mccc2)
P97807	0.00790385	1.33792	Fh1	fumarate hydratase 1(Fh1)
Q9DCX2	0.00288605	1.33718	Atp5h	ATP synthase, H+ transporting, mitochondrial F0 complex, subunit D(Atp5h)
O08749	0.00059589	1.3341	Dld	dihydrolipoamide dehydrogenase(Dld)
Q8QZS1	0.00472636	1.3294	Hibch	3-hydroxyisobutyryl-Coenzyme A hydrolase(Hibch)
Q8VEM8	0.000882223	1.32891	Slc25a3	solute carrier family 25 (mitochondrial carrier, phosphate carrier), member 3(Slc25a3)
Q78IK2	0.000703719	1.3261	Atp5md	ATP synthase membrane subunit DAPIT(Atp5md)
P56480	6.95072e-08	1.32437	Atp5b	ATP synthase, H+ transporting mitochondrial F1 complex, beta subunit(Atp5b)
O09111	0.0029512	1.32383	Ndufb11	NADH:ubiquinone oxidoreductase subunit B11(Ndufb11)
Q8BWT1	3.10281e-06	1.32363	Acaa2	acetyl-Coenzyme A acyltransferase 2 (mitochondrial 3-oxoacyl-Coenzyme A thiolase)(Acaa2)
Q9CQ62	0.000587895	1.32123	Decr1	2,4-dienoyl CoA reductase 1, mitochondrial(Decr1)
Q62425	0.00255393	1.31625	Ndufa4	Ndufa4, mitochondrial complex associated(Ndufa4)
Q9Z2I9	5.93369e-05	1.3159	Sucla2	succinate-Coenzyme A ligase, ADP-forming, beta subunit(Sucla2)
Q6P8J7	0.000266968	1.31325	Ckmt2	creatine kinase, mitochondrial 2(Ckmt2)
P04117	0.00583397	1.30879	Fabp4	fatty acid binding protein 4, adipocyte(Fabp4)
P48962	0.000244351	1.30658	Slc25a4	solute carrier family 25 (mitochondrial carrier, adenine nucleotide translocator), member 4(Slc25a4)
P53395	0.00546416	1.30587	Dbt	dihydrolipoamide branched chain transacylase E2(Dbt)
P19123	0.00386189	1.30186	Tnnc1	troponin C, cardiac/slow skeletal(Tnnc1)
Q91VR2	0.000484071	1.30086	Atp5c1	ATP synthase, H+ transporting, mitochondrial F1 complex, gamma polypeptide 1(Atp5c1)
Q8BMS1	2.10627e-06	1.2996	Hadha	hydroxyacyl-CoA dehydrogenase trifunctional multienzyme complex subunit alpha(Hadha)
O70250	0.0137903	1.29859	Pgam2	phosphoglycerate mutase 2(Pgam2)
P62984	0.00266855	1.29274	Uba52	ubiquitin A-52 residue ribosomal protein fusion product 1(Uba52)
Q9DB77	0.000969742	1.29214	Uqcrc2	ubiquinol cytochrome c reductase core protein 2(Uqcrc2)
Q9CR84	4.62477e-06	1.28757	Atp5g1	ATP synthase, H+ transporting, mitochondrial F0 complex, subunit C1 (subunit 9)(Atp5g1)
Q99NB1	0.000288482	1.28392	Acss1	acyl-CoA synthetase short-chain family member 1(Acss1)
P47857	0.00109585	1.2832	Pfkm	phosphofructokinase, muscle(Pfkm)
Q9DCT2	0.000581101	1.27964	Ndufs3	NADH:ubiquinone oxidoreductase core subunit S3(Ndufs3)
Q9D172	0.00276986	1.27714	Gatd3a	glutamine amidotransferase like class 1 domain containing 3A(Gatd3a)
P04247	0.000108926	1.27691	Mb	myoglobin(Mb)
Q921G7	2.93919e-07	1.27676	Etfdh	electron transferring flavoprotein, dehydrogenase(Etfdh)
O88342	0.0210033	1.27285	Wdr1	WD repeat domain 1(Wdr1)
Q99JY0	2.65723e-05	1.27196	Hadhb	hydroxyacyl-CoA dehydrogenase trifunctional multienzyme complex subunit beta(Hadhb)
Q7TQ48	0.00209335	1.26595	Srl	sarcalumenin(Srl)
P45952	0.000150423	1.26303	Acadm	acyl-Coenzyme A dehydrogenase, medium chain(Acadm)
Q07417	0.00973559	1.26111	Acads	acyl-Coenzyme A dehydrogenase, short chain(Acads)
P50544	0.000113496	1.26094	Acadvl	acyl-Coenzyme A dehydrogenase, very long chain(Acadvl)
P20108	0.00194588	1.25811	Prdx3	peroxiredoxin 3(Prdx3)
P19783	8.57037e-06	1.25634	Cox4i1	cytochrome c oxidase subunit 4I1(Cox4i1)
Q8BFR5	0.000346673	1.25594	Tufm	Tu translation elongation factor, mitochondrial(Tufm)
Q9D8N0	0.00126888	1.25576	Eef1g	eukaryotic translation elongation factor 1 gamma(Eef1g)
P99029	0.0184539	1.25545	Prdx5	peroxiredoxin 5(Prdx5)
P14152	0.000379242	1.2539	Mdh1	malate dehydrogenase 1, NAD (soluble)(Mdh1)
Q9CQ92	0.0377181	1.24635	Fis1	fission, mitochondrial 1(Fis1)
O55143	0.000306545	1.24375	Atp2a2	ATPase, Ca++ transporting, cardiac muscle, slow twitch 2(Atp2a2)
Q8R4N0	0.00918983	1.24076	Clybl	citrate lyase beta like(Clybl)
P56391	0.00758188	1.24066	Cox6b1	cytochrome c oxidase, subunit 6B1(Cox6b1)
Q9JHI5	0.000297503	1.23921	Ivd	isovaleryl coenzyme A dehydrogenase(Ivd)
P68033	0.000558234	1.23885	Actc1	actin, alpha, cardiac muscle 1(Actc1)
Q03265	0.000151048	1.23669	Atp5a1	ATP synthase, H+ transporting, mitochondrial F1 complex, alpha subunit 1(Atp5a1)
P17182	0.00446885	1.23651	Eno1	enolase 1, alpha non-neuron(Eno1)
Q8QZT1	0.00315015	1.23468	Acat1	acetyl-Coenzyme A acetyltransferase 1(Acat1)
Q8VDN2	0.00235426	1.23016	Atp1a1	ATPase, Na+/K+ transporting, alpha 1 polypeptide(Atp1a1)
Q9D0M3	0.0310792	1.22964	Cyc1	cytochrome c-1(Cyc1)
P17751	0.00919106	1.22442	Tpi1	triosephosphate isomerase 1(Tpi1)
Q60870	0.0153707	1.22108	Reep5	receptor accessory protein 5(Reep5)
Q4ZJM7	0.0461699	1.21978	Otol1	otolin 1(Otol1)
P62880	0.0241799	1.21804	Gnb2	guanine nucleotide binding protein (G protein), beta 2(Gnb2)
P20029	0.0355474	1.21605	Hspa5	heat shock protein 5(Hspa5)
P97450	0.00268392	1.215	Atp5j	ATP synthase, H+ transporting, mitochondrial F0 complex, subunit F(Atp5j)
Q9WUR9	0.0357187	1.2149	Ak4	adenylate kinase 4(Ak4)
Q9DC69	0.0149176	1.21131	Ndufa9	NADH:ubiquinone oxidoreductase subunit A9(Ndufa9)
P07310	6.23897e-07	1.20504	Ckm	creatine kinase, muscle(Ckm)
Q9ERS2	0.00515202	1.20135	Ndufa13	NADH:ubiquinone oxidoreductase subunit A13(Ndufa13)
Q9D051	0.000450001	1.19885	Pdhb	pyruvate dehydrogenase (lipoamide) beta(Pdhb)
P08228	0.00266851	1.19848	Sod1	superoxide dismutase 1, soluble(Sod1)
Q9CR61	0.0201653	1.19795	Ndufb7	NADH:ubiquinone oxidoreductase subunit B7(Ndufb7)
P43407	0.0117126	0.831394	Sdc2	syndecan 2(Sdc2)
Q8R516	0.0263238	0.830328	Mib2	mindbomb E3 ubiquitin protein ligase 2(Mib2)
Q8K1Z0	0.0371937	0.82917	Coq9	coenzyme Q9(Coq9)
P27773	0.0189072	0.828081	Pdia3	protein disulfide isomerase associated 3(Pdia3)
Q01853	0.0034395	0.827162	Vcp	valosin containing protein(Vcp)
O88532	0.0458707	0.823942	Zfr	zinc finger RNA binding protein(Zfr)
Q8VHX6	0.0409743	0.819571	Flnc	filamin C, gamma(Flnc)
P61021	0.0213041	0.819047	Rab5b	RAB5B, member RAS oncogene family(Rab5b)
Q99MS7	0.0171193	0.816475	Ehbp1l1	EH domain binding protein 1-like 1(Ehbp1l1)
P26041	0.00610929	0.815272	Msn	moesin(Msn)
Q62188	0.0189711	0.814438	Dpysl3	dihydropyrimidinase-like 3(Dpysl3)
Q62261	0.0139106	0.812802	Sptbn1	spectrin beta, non-erythrocytic 1(Sptbn1)
Q9QXG4	0.00519244	0.808751	Acss2	acyl-CoA synthetase short-chain family member 2(Acss2)
Q8BGD8	0.0408267	0.804687	Coa6	cytochrome c oxidase assembly factor 6(Coa6)
Q60953	0.00272628	0.802759	Pml	promyelocytic leukemia(Pml)
Q91V98	0.0268233	0.802233	Cd248	CD248 antigen, endosialin(Cd248)
Q3TWW8	0.0256989	0.801183	Srsf6	serine and arginine-rich splicing factor 6(Srsf6)
Q6PB66	0.0440135	0.801168	Lrpprc	leucine-rich PPR-motif containing(Lrpprc)
Q60980	0.00538129	0.797107	Klf3	Kruppel-like factor 3 (basic)(Klf3)
O54724	0.00164905	0.795484	Cavin1	caveolae associated 1(Cavin1)
Q9Z188	0.0213082	0.794676	Dyrk1b	dual-specificity tyrosine-(Y)-phosphorylation regulated kinase 1b(Dyrk1b)
P50462	0.00491138	0.794629	Csrp3	cysteine and glycine-rich protein 3(Csrp3)
Q3UZA1	0.00927081	0.794334	Rcsd1	RCSD domain containing 1(Rcsd1)
P14869	0.0230546	0.794066	Rplp0	ribosomal protein, large, P0(Rplp0)
Q6PDG5	0.00908492	0.792934	Smarcc2	SWI/SNF related, matrix associated, actin dependent regulator of chromatin, subfamily c, member 2(Smarcc2)
P70213	0.0298233	0.79136	Fv1	Friend virus susceptibility 1(Fv1)
P13541	0.0497037	0.790676	Myh3	myosin, heavy polypeptide 3, skeletal muscle, embryonic(Myh3)
F6ZDS4	0.000362956	0.790476	Tpr	translocated promoter region, nuclear basket protein(Tpr)
Q9R069	0.0120384	0.787536	Bcam	basal cell adhesion molecule(Bcam)
Q3U1Y4	0.0440033	0.78708	Dennd4b	DENN/MADD domain containing 4B(Dennd4b)
Q64727	0.000418177	0.784393	Vcl	vinculin(Vcl)
P57776	0.000175806	0.783703	Eef1d	eukaryotic translation elongation factor 1 delta (guanine nucleotide exchange protein)(Eef1d)
P35283	0.0141488	0.779753	Rab12	RAB12, member RAS oncogene family(Rab12)
P54731	0.0014686	0.778805	Faf1	Fas-associated factor 1(Faf1)
Q8K019	0.000106262	0.777714	Bclaf1	BCL2-associated transcription factor 1(Bclaf1)
O08784	0.0184832	0.777599	Tcof1	treacle ribosome biogenesis factor 1(Tcof1)
P68404	0.00691712	0.777549	Prkcb	protein kinase C, beta(Prkcb)
Q6P6L0	0.0240148	0.775329	Filip1l	filamin A interacting protein 1-like(Filip1l)
Q8K4Z0	0.0481918	0.774113	Lgi2	leucine-rich repeat LGI family, member 2(Lgi2)
Q9D1L0	0.0159813	0.773783	Chchd2	coiled-coil-helix-coiled-coil-helix domain containing 2(Chchd2)
Q8CI51	0.00171379	0.773622	Pdlim5	PDZ and LIM domain 5(Pdlim5)
Q6PDN3	0.0445062	0.7735	Mylk	myosin, light polypeptide kinase(Mylk)
Q9D0B0	0.00569935	0.772796	Srsf9	serine and arginine-rich splicing factor 9(Srsf9)
Q8R3V6	0.0222502	0.772539	Cuedc1	CUE domain containing 1(Cuedc1)
Q3UMF0	0.00331873	0.771132	Cobll1	Cobl-like 1(Cobll1)
A2ASS6	0.00133198	0.771064	Ttn	titin(Ttn)
Q99PL6	0.0113277	0.770857	Ubxn6	UBX domain protein 6(Ubxn6)
Q921F4	0.0294702	0.770544	Hnrnpll	heterogeneous nuclear ribonucleoprotein L-like(Hnrnpll)
Q8BL97	0.00345828	0.768231	Srsf7	serine and arginine-rich splicing factor 7(Srsf7)
Q80UP8	0.00104293	0.767746	Slc20a2	solute carrier family 20, member 2(Slc20a2)
Q6NZN0	0.0230807	0.764042	Rbm26	RNA binding motif protein 26(Rbm26)
Q8BGU5	5.2408e-05	0.76356	Ccny	cyclin Y(Ccny)
Q9CQV8	0.0433066	0.763301	Ywhab	tyrosine 3-monooxygenase/tryptophan 5-monooxygenase activation protein, beta polypeptide(Ywhab)
Q3TLI0	0.0233778	0.761928	Trappc10	trafficking protein particle complex 10(Trappc10)
P27546	0.000358992	0.761755	Map4	microtubule-associated protein 4(Map4)
P01872	0.0016353	0.761527	Ighm	immunoglobulin heavy constant mu(Ighm)
Q9EST5	0.0242584	0.761522	Anp32b	acidic (leucine-rich) nuclear phosphoprotein 32 family, member B(Anp32b)
Q2TBE6	0.00037125	0.759682	Pi4k2a	phosphatidylinositol 4-kinase type 2 alpha(Pi4k2a)
Q6A0D4	0.00304481	0.759225	Rftn1	raftlin lipid raft linker 1(Rftn1)
P63017	0.000884414	0.759029	Hspa8	heat shock protein 8(Hspa8)
Q3UHD3	3.90958e-05	0.757929	Mtus2	microtubule associated tumor suppressor candidate 2(Mtus2)
P83741	0.00447899	0.756823	Wnk1	WNK lysine deficient protein kinase 1(Wnk1)
E9Q6P5	0.00109764	0.756056	Ttc7b	tetratricopeptide repeat domain 7B(Ttc7b)
A2AMM0	0.00280538	0.755235	Cavin4	caveolae associated 4(Cavin4)
Q91YE8	0.0177016	0.755012	Synpo2	synaptopodin 2(Synpo2)
P51125	0.00931335	0.753783	Cast	calpastatin(Cast)
Q99P72	0.00759679	0.752323	Rtn4	reticulon 4(Rtn4)
P48678	0.00085602	0.751979	Lmna	lamin A(Lmna)
O55028	0.000299194	0.750861	Bckdk	branched chain ketoacid dehydrogenase kinase(Bckdk)
Q9JJG0	0.00264426	0.750221	Tacc2	transforming, acidic coiled-coil containing protein 2(Tacc2)
Q8K1H7	0.0102301	0.748688	Tcp11l2	t-complex 11 (mouse) like 2(Tcp11l2)
A2AJI0	0.000235525	0.748377	Map7d1	MAP7 domain containing 1(Map7d1)
Q52KI8	0.00434957	0.746389	Srrm1	serine/arginine repetitive matrix 1(Srrm1)
Q01815	0.00297191	0.740689	Cacna1c	calcium channel, voltage-dependent, L type, alpha 1C subunit(Cacna1c)
D3YXK2	0.00372415	0.739375	Safb	scaffold attachment factor B(Safb)
Q9DAZ9	0.00808114	0.738852	Zfyve19	zinc finger, FYVE domain containing 19(Zfyve19)
B2RY56	0.00110867	0.738281	Rbm25	RNA binding motif protein 25(Rbm25)
Q8JZQ9	0.000354625	0.737224	Eif3b	eukaryotic translation initiation factor 3, subunit B(Eif3b)
Q8BGV8	0.000792136	0.737024	Mief1	mitochondrial elongation factor 1(Mief1)
Q8BTI8	5.21629e-05	0.736978	Srrm2	serine/arginine repetitive matrix 2(Srrm2)
O54962	0.00500572	0.735984	Banf1	BAF nuclear assembly factor 1(Banf1)
Q64096	0.0387938	0.735432	Mcf2l	mcf.2 transforming sequence-like(Mcf2l)
P70698	0.00112527	0.734911	Ctps	cytidine 5'-triphosphate synthase(Ctps)
Q8BGD9	0.00105682	0.733929	Eif4b	eukaryotic translation initiation factor 4B(Eif4b)
Q3UHJ0	1.66492e-05	0.729038	Aak1	AP2 associated kinase 1(Aak1)
Q9ET54	0.000202569	0.726159	Palld	palladin, cytoskeletal associated protein(Palld)
Q8BI72	0.000870431	0.725976	Cdkn2aip	CDKN2A interacting protein(Cdkn2aip)
Q9JJW5	5.06583e-05	0.72425	Myoz2	myozenin 2(Myoz2)
Q9CSN1	0.00105784	0.723566	Snw1	SNW domain containing 1(Snw1)
P70399	0.005856	0.722581	Trp53bp1	transformation related protein 53 binding protein 1(Trp53bp1)
Q6P4S6	0.0105063	0.721556	Sik3	SIK family kinase 3(Sik3)
P70333	0.000234282	0.72115	Hnrnph2	heterogeneous nuclear ribonucleoprotein H2(Hnrnph2)
Q62048	0.00299829	0.719522	Pea15a	proliferation and apoptosis adaptor protein 15A(Pea15a)
Q8BZF8	0.00894342	0.719221	Pgm5	phosphoglucomutase 5(Pgm5)
Q62417	0.0133988	0.718698	Sorbs1	sorbin and SH3 domain containing 1(Sorbs1)
Q80XU3	0.00245892	0.718571	Nucks1	nuclear casein kinase and cyclin-dependent kinase substrate 1(Nucks1)
Q8R361	0.0277605	0.714611	Rab11fip5	RAB11 family interacting protein 5 (class I)(Rab11fip5)
A2AIV2	0.000465461	0.714394	Virma	vir like m6A methyltransferase associated(Virma)
Q60668	0.00027036	0.714232	Hnrnpd	heterogeneous nuclear ribonucleoprotein D(Hnrnpd)
Q8BGC0	0.0133485	0.713532	Htatsf1	HIV TAT specific factor 1(Htatsf1)
Q9DBC7	0.000161515	0.713011	Prkar1a	protein kinase, cAMP dependent regulatory, type I, alpha(Prkar1a)
Q61235	3.50704e-05	0.711385	Sntb2	syntrophin, basic 2(Sntb2)
P62071	0.000165375	0.710356	Rras2	related RAS viral (r-ras) oncogene 2(Rras2)
Q8VBT0	0.00138644	0.710033	Tmx1	thioredoxin-related transmembrane protein 1(Tmx1)
Q3UW53	0.00092065	0.709725	Niban1	niban apoptosis regulator 1(Niban1)
P26883	0.0231929	0.70962	Fkbp1a	FK506 binding protein 1a(Fkbp1a)
Q921T2	0.00296779	0.7094	Tor1aip1	torsin A interacting protein 1(Tor1aip1)
P53986	3.12259e-06	0.709011	Slc16a1	solute carrier family 16 (monocarboxylic acid transporters), member 1(Slc16a1)
O35295	0.00904347	0.708717	Purb	purine rich element binding protein B(Purb)
Q3UIR3	0.00402753	0.708547	Dtx3l	deltex 3-like, E3 ubiquitin ligase(Dtx3l)
P68181	0.0281272	0.707975	Prkacb	protein kinase, cAMP dependent, catalytic, beta(Prkacb)
Q91YN9	0.000896778	0.707135	Bag2	BCL2-associated athanogene 2(Bag2)
Q8C0E3	0.000873568	0.706402	Trim47	tripartite motif-containing 47(Trim47)
Q80XQ2	0.00524142	0.705007	Tbc1d5	TBC1 domain family, member 5(Tbc1d5)
Q9ES28	0.00630716	0.704861	Arhgef7	Rho guanine nucleotide exchange factor (GEF7)(Arhgef7)
Q62318	0.00984997	0.704388	Trim28	tripartite motif-containing 28(Trim28)
E9Q1P8	0.000123708	0.704048	Irf2bp2	interferon regulatory factor 2 binding protein 2(Irf2bp2)
Q80Y81	0.00962432	0.702323	Elac2	elaC ribonuclease Z 2(Elac2)
Q9CZX7	0.00254606	0.701349	Pip4p2	phosphatidylinositol-4,5-bisphosphate 4-phosphatase 2(Pip4p2)
Q3TLH4	0.000907047	0.701239	Prrc2c	proline-rich coiled-coil 2C(Prrc2c)
Q9WV60	0.00150052	0.700988	Gsk3b	glycogen synthase kinase 3 beta(Gsk3b)
Q62093	0.0138462	0.700912	Srsf2	serine and arginine-rich splicing factor 2(Srsf2)
Q3UJU9	9.04686e-05	0.700799	Rmdn3	regulator of microtubule dynamics 3(Rmdn3)
Q02248	4.0932e-05	0.70065	Ctnnb1	catenin (cadherin associated protein), beta 1(Ctnnb1)
O08715	0.000223708	0.700637	Akap1	A kinase (PRKA) anchor protein 1(Akap1)
Q9CRD0	0.00520296	0.69871	Ociad1	OCIA domain containing 1(Ociad1)
P61082	1.18378e-05	0.698318	Ube2m	ubiquitin-conjugating enzyme E2M(Ube2m)
P70313	0.000299397	0.697944	Nos3	nitric oxide synthase 3, endothelial cell(Nos3)
Q0VBL3	0.0204181	0.696991	Rbm15	RNA binding motif protein 15(Rbm15)
Q9ESZ8	0.0012888	0.696904	Gtf2i	general transcription factor II I(Gtf2i)
P36552	0.000536022	0.696246	Cpox	coproporphyrinogen oxidase(Cpox)
Q8CHQ0	0.00939593	0.695779	Fbxo4	F-box protein 4(Fbxo4)
P97863	0.000152708	0.694312	Nfib	nuclear factor I/B(Nfib)
Q91ZA3	0.0191744	0.693828	Pcca	propionyl-Coenzyme A carboxylase, alpha polypeptide(Pcca)
Q80W47	3.56402e-06	0.692972	Wipi2	WD repeat domain, phosphoinositide interacting 2(Wipi2)
Q8CJ53	0.000335725	0.692958	Trip10	thyroid hormone receptor interactor 10(Trip10)
Q14DQ1	0.00573411	0.692182	Fam219b	family with sequence similarity 219, member B(Fam219b)
Q9ET78	4.76984e-08	0.692136	Jph2	junctophilin 2(Jph2)
Q6PAM0	0.00852373	0.69211	Prkab2	protein kinase, AMP-activated, beta 2 non-catalytic subunit(Prkab2)
Q569Z6	1.09276e-06	0.691361	Thrap3	thyroid hormone receptor associated protein 3(Thrap3)
Q62219	2.9825e-06	0.690355	Tgfb1i1	transforming growth factor beta 1 induced transcript 1(Tgfb1i1)
Q99MD6	0.000248954	0.689496	Txnrd3	thioredoxin reductase 3(Txnrd3)
Q80U58	0.0012804	0.689226	Pum2	pumilio RNA-binding family member 2(Pum2)
Q6P9R2	0.00964182	0.689193	Oxsr1	oxidative-stress responsive 1(Oxsr1)
Q99PL5	0.00116867	0.689053	Rrbp1	ribosome binding protein 1(Rrbp1)
Q9WVT6	0.00717438	0.68893	Car14	carbonic anhydrase 14(Car14)
Q149B8	7.50543e-08	0.688813	Perm1	PPARGC1 and ESRR induced regulator, muscle 1(Perm1)
Q9CZJ2	1.19468e-08	0.688772	Hspa12b	heat shock protein 12B(Hspa12b)
P42208	6.95182e-05	0.688393	Septin2	septin 2(Septin2)
Q63918	0.000715481	0.68758	Cavin2	caveolae associated 2(Cavin2)
Q5EG47	0.0024672	0.686966	Prkaa1	protein kinase, AMP-activated, alpha 1 catalytic subunit(Prkaa1)
Q8BP27	1.09229e-06	0.686467	Sfr1	SWI5 dependent recombination repair 1(Sfr1)
Q8C079	0.0120156	0.686186	Strip1	striatin interacting protein 1(Strip1)
Q6PFR5	4.04892e-05	0.68592	Tra2a	transformer 2 alpha(Tra2a)
Q9Z2C4	0.000437748	0.685836	Mtmr1	myotubularin related protein 1(Mtmr1)
Q99JB8	6.7259e-05	0.684563	Pacsin3	protein kinase C and casein kinase substrate in neurons 3(Pacsin3)
Q9JJZ4	0.0116739	0.684255	Ube2j1	ubiquitin-conjugating enzyme E2J 1(Ube2j1)
Q8C206	0.00143512	0.683308	Gpr157	G protein-coupled receptor 157(Gpr157)
Q62422	0.000838021	0.682622	Ostf1	osteoclast stimulating factor 1(Ostf1)
G5E870	0.00045889	0.681848	Trip12	thyroid hormone receptor interactor 12(Trip12)
P97855	0.000412351	0.681721	G3bp1	GTPase activating protein (SH3 domain) binding protein 1(G3bp1)
P63101	0.000265733	0.681548	Ywhaz	tyrosine 3-monooxygenase/tryptophan 5-monooxygenase activation protein, zeta polypeptide(Ywhaz)
E9Q4Z2	3.5774e-06	0.680168	Acacb	acetyl-Coenzyme A carboxylase beta(Acacb)
Q61234	0.000193234	0.679502	Snta1	syntrophin, acidic 1(Snta1)
Q9WTQ5	0.00156065	0.678864	Akap12	A kinase (PRKA) anchor protein (gravin) 12(Akap12)
Q3UHX2	0.00109576	0.6782	Pdap1	PDGFA associated protein 1(Pdap1)
Q9CWK3	0.000182292	0.678075	Cd2bp2	CD2 cytoplasmic tail binding protein 2(Cd2bp2)
Q69ZR2	0.000716221	0.677337	Hectd1	HECT domain E3 ubiquitin protein ligase 1(Hectd1)
Q8BJU0	1.69733e-06	0.676903	Sgta	small glutamine-rich tetratricopeptide repeat (TPR)-containing, alpha(Sgta)
Q9JHU2	6.18032e-07	0.676634	Palmd	palmdelphin(Palmd)
P49586	0.000104791	0.675397	Pcyt1a	phosphate cytidylyltransferase 1, choline, alpha isoform(Pcyt1a)
Q6ZQB6	4.64691e-05	0.674976	Ppip5k2	diphosphoinositol pentakisphosphate kinase 2(Ppip5k2)
Q61584	0.00101225	0.6748	Fxr1	FMR1 autosomal homolog 1(Fxr1)
Q6ZQ03	0.000547229	0.674418	Fnbp4	formin binding protein 4(Fnbp4)
Q9JM73	5.75369e-05	0.674287	Srf	serum response factor(Srf)
Q8R3Y8	0.000678988	0.674248	Irf2bp1	interferon regulatory factor 2 binding protein 1(Irf2bp1)
P26231	0.00056946	0.673592	Ctnna1	catenin (cadherin associated protein), alpha 1(Ctnna1)
Q61136	0.00604891	0.673496	Prpf4b	pre-mRNA processing factor 4B(Prpf4b)
Q3V3A7	0.00157264	0.672831	Rnf207	ring finger protein 207(Rnf207)
Q5DTJ9	2.08543e-05	0.67261	Mypn	myopalladin(Mypn)
B9EJ86	0.000922415	0.67112	Osbpl8	oxysterol binding protein-like 8(Osbpl8)
Q9CQF4	3.36421e-05	0.669385	Mtres1	mitochondrial transcription rescue factor 1(Mtres1)
Q70KF4	2.52129e-05	0.668396	Cmya5	cardiomyopathy associated 5(Cmya5)
P09470	1.24603e-05	0.668168	Ace	angiotensin I converting enzyme (peptidyl-dipeptidase A) 1(Ace)
Q8C0E2	0.00454021	0.667967	Vps26b	VPS26 retromer complex component B(Vps26b)
O35551	0.00121965	0.665724	Rabep1	rabaptin, RAB GTPase binding effector protein 1(Rabep1)
Q8K4Q0	0.000513245	0.665114	Rptor	regulatory associated protein of MTOR, complex 1(Rptor)
Q99KG3	0.000161087	0.663497	Rbm10	RNA binding motif protein 10(Rbm10)
P35486	1.28805e-05	0.663335	Pdha1	pyruvate dehydrogenase E1 alpha 1(Pdha1)
Q8BG05	0.000272568	0.662115	Hnrnpa3	heterogeneous nuclear ribonucleoprotein A3(Hnrnpa3)
Q9QXM1	0.009205	0.662027	Jmy	junction-mediating and regulatory protein(Jmy)
Q3UQS8	6.28117e-08	0.661581	Rbm20	RNA binding motif protein 20(Rbm20)
Q3UPL0	0.000591333	0.660839	Sec31a	Sec31 homolog A (S. cerevisiae)(Sec31a)
Q8K1L5	0.00639943	0.658735	Ppp1r11	protein phosphatase 1, regulatory inhibitor subunit 11(Ppp1r11)
Q9DAQ4	0.0237275	0.65688	1700003E16Rik	RIKEN cDNA 1700003E16 gene(1700003E16Rik)
Q9CZW5	5.48339e-05	0.655513	Tomm70a	translocase of outer mitochondrial membrane 70A(Tomm70a)
O70589	0.000657379	0.652702	Cask	calcium/calmodulin-dependent serine protein kinase (MAGUK family)(Cask)
Q921C5	0.00287952	0.652584	Bicd2	BICD cargo adaptor 2(Bicd2)
Q9WTX2	0.000829094	0.652046	Prkra	protein kinase, interferon inducible double stranded RNA dependent activator(Prkra)
P97792	0.000329928	0.650042	Cxadr	coxsackie virus and adenovirus receptor(Cxadr)
Q8BH64	0.000115852	0.649951	Ehd2	EH-domain containing 2(Ehd2)
P10711	0.00246965	0.648546	Tcea1	transcription elongation factor A (SII) 1(Tcea1)
Q9DB70	0.00128109	0.647988	Fundc1	FUN14 domain containing 1(Fundc1)
Q8K3W3	0.000450426	0.64789	Casc3	cancer susceptibility candidate 3(Casc3)
Q05793	0.00163058	0.647743	Hspg2	perlecan (heparan sulfate proteoglycan 2)(Hspg2)
Q60929	0.0019448	0.647217	Mef2a	myocyte enhancer factor 2A(Mef2a)
Q8CHU3	3.3955e-05	0.646511	Epn2	epsin 2(Epn2)
Q65CL1	0.00141621	0.645818	Ctnna3	catenin (cadherin associated protein), alpha 3(Ctnna3)
B1AZA5	1.99414e-05	0.644874	Tmem245	transmembrane protein 245(Tmem245)
Q9ES83	3.6692e-05	0.644465	Bves	blood vessel epicardial substance(Bves)
O70133	1.35317e-05	0.643977	Dhx9	DEAH (Asp-Glu-Ala-His) box polypeptide 9(Dhx9)
P62259	0.000246702	0.643391	Ywhae	tyrosine 3-monooxygenase/tryptophan 5-monooxygenase activation protein, epsilon polypeptide(Ywhae)
Q9D8T7	5.17e-05	0.643104	Slirp	SRA stem-loop interacting RNA binding protein(Slirp)
Q8VH51	0.00118895	0.642117	Rbm39	RNA binding motif protein 39(Rbm39)
E9Q7G0	0.00242677	0.641845	Numa1	nuclear mitotic apparatus protein 1(Numa1)
Q9R0P4	8.20376e-05	0.641334	1110004F10Rik	RIKEN cDNA 1110004F10 gene(1110004F10Rik)
Q9CQV4	8.47139e-06	0.641008	Retreg3	reticulophagy regulator family member 3(Retreg3)
Q9R1Z8	0.0221769	0.640291	Sorbs3	sorbin and SH3 domain containing 3(Sorbs3)
O09044	9.91723e-05	0.639604	Snap23	synaptosomal-associated protein 23(Snap23)
P50543	8.77242e-05	0.639386	S100a11	S100 calcium binding protein A11(S100a11)
P70271	0.00326112	0.638894	Pdlim4	PDZ and LIM domain 4(Pdlim4)
P97496	0.019984	0.636647	Smarcc1	SWI/SNF related, matrix associated, actin dependent regulator of chromatin, subfamily c, member 1(Smarcc1)
P62960	0.000456044	0.636249	Ybx1	Y box protein 1(Ybx1)
P35383	0.000402755	0.632717	P2ry2	purinergic receptor P2Y, G-protein coupled 2(P2ry2)
Q5FW52	1.1792e-05	0.63208	Mlip	muscular LMNA-interacting protein(Mlip)
Q64012	1.71413e-06	0.631883	Raly	hnRNP-associated with lethal yellow(Raly)
Q8VEK3	7.08681e-06	0.631818	Hnrnpu	heterogeneous nuclear ribonucleoprotein U(Hnrnpu)
A2AAJ9	0.00340191	0.630858	Obscn	obscurin, cytoskeletal calmodulin and titin-interacting RhoGEF(Obscn)
Q9Z0U1	0.000142715	0.630014	Tjp2	tight junction protein 2(Tjp2)
P47955	0.0191253	0.62978	Rplp1	ribosomal protein, large, P1(Rplp1)
Q8K012	0.00205812	0.629614	Fnbp1l	formin binding protein 1-like(Fnbp1l)
Q8R344	0.00100742	0.628616	Ccdc12	coiled-coil domain containing 12(Ccdc12)
P39447	8.43583e-06	0.626973	Tjp1	tight junction protein 1(Tjp1)
Q4VA53	0.00595283	0.626668	Pds5b	PDS5 cohesin associated factor B(Pds5b)
Q3UTJ2	4.90988e-07	0.626422	Sorbs2	sorbin and SH3 domain containing 2(Sorbs2)
C0HKD9	0.000170789	0.626014	Mfap1b	microfibrillar-associated protein 1B(Mfap1b)
P63094	4.7386e-06	0.625817	Gnas	GNAS (guanine nucleotide binding protein, alpha stimulating) complex locus(Gnas)
Q6PD03	0.000440937	0.625736	Ppp2r5a	protein phosphatase 2, regulatory subunit B', alpha(Ppp2r5a)
P70452	0.000619288	0.624905	Stx4a	syntaxin 4A (placental)(Stx4a)
P58871	1.21532e-05	0.624799	Tnks1bp1	tankyrase 1 binding protein 1(Tnks1bp1)
Q99J36	0.000180996	0.624565	Thumpd1	THUMP domain containing 1(Thumpd1)
Q9DBS9	5.37201e-06	0.624343	Osbpl3	oxysterol binding protein-like 3(Osbpl3)
Q8BRK8	0.031996	0.623622	Prkaa2	protein kinase, AMP-activated, alpha 2 catalytic subunit(Prkaa2)
O70548	7.47135e-05	0.623473	Tcap	titin-cap(Tcap)
Q8CGB6	2.15313e-06	0.622318	Tns2	tensin 2(Tns2)
Q9R078	0.000157136	0.622084	Prkab1	protein kinase, AMP-activated, beta 1 non-catalytic subunit(Prkab1)
Q8VDQ8	0.000468857	0.621485	Sirt2	sirtuin 2(Sirt2)
P35831	0.00038499	0.620976	Ptpn12	protein tyrosine phosphatase, non-receptor type 12(Ptpn12)
Q9Z1E4	4.85578e-06	0.619914	Gys1	glycogen synthase 1, muscle(Gys1)
E9Q401	2.21136e-06	0.618989	Ryr2	ryanodine receptor 2, cardiac(Ryr2)
Q6ZQ58	0.000158555	0.61894	Larp1	La ribonucleoprotein domain family, member 1(Larp1)
Q9D0L8	4.52902e-05	0.618289	Rnmt	RNA (guanine-7-) methyltransferase(Rnmt)
Q8R4X3	0.00218955	0.617916	Rbm12	RNA binding motif protein 12(Rbm12)
Q8R0T2	0.000871723	0.615972	Zfp768	zinc finger protein 768(Zfp768)
Q9JI99	0.000201172	0.615858	Sgpp1	sphingosine-1-phosphate phosphatase 1(Sgpp1)
Q920A7	0.0010132	0.615312	Afg3l1	AFG3-like AAA ATPase 1(Afg3l1)
Q80TV8	0.000833464	0.615296	Clasp1	CLIP associating protein 1(Clasp1)
Q91W69	0.000586941	0.613892	Epn3	epsin 3(Epn3)
Q61165	1.17654e-06	0.611613	Slc9a1	solute carrier family 9 (sodium/hydrogen exchanger), member 1(Slc9a1)
A2AQ25	0.00040286	0.611442	Etl4	enhancer trap locus 4(Etl4)
Q8BXA1	0.0197006	0.608618	Golim4	golgi integral membrane protein 4(Golim4)
Q8JZX4	2.03203e-05	0.607962	Rbm17	RNA binding motif protein 17(Rbm17)
P06837	0.00026982	0.607447	Gap43	growth associated protein 43(Gap43)
Q80TY0	0.00039238	0.60737	Fnbp1	formin binding protein 1(Fnbp1)
Q7TPW1	7.08333e-06	0.607188	Nexn	nexilin(Nexn)
Q7TMY8	2.13192e-06	0.606029	Huwe1	HECT, UBA and WWE domain containing 1(Huwe1)
Q64735	0.000855287	0.605906	Cr1l	complement component (3b/4b) receptor 1-like(Cr1l)
Q9JK91	1.97488e-05	0.605753	Mlh1	mutL homolog 1(Mlh1)
Q9WVC3	8.02503e-05	0.603888	Cav2	caveolin 2(Cav2)
Q91ZU6	0.0168756	0.603786	Dst	dystonin(Dst)
Q9QYG0	3.88734e-07	0.603252	Ndrg2	N-myc downstream regulated gene 2(Ndrg2)
Q3UH68	2.21364e-09	0.602431	Limch1	LIM and calponin homology domains 1(Limch1)
Q07113	0.000504528	0.601788	Igf2r	insulin-like growth factor 2 receptor(Igf2r)
Q6P542	0.0099504	0.601662	Abcf1	ATP-binding cassette, sub-family F (GCN20), member 1(Abcf1)
Q91ZV0	0.0199903	0.601251	Mia2	MIA SH3 domain ER export factor 2(Mia2)
P23242	6.27806e-05	0.601029	Gja1	gap junction protein, alpha 1(Gja1)
O55003	0.000104249	0.600749	Bnip3	BCL2/adenovirus E1B interacting protein 3(Bnip3)
Q62234	0.0228238	0.600278	Myom1	myomesin 1(Myom1)
O88738	0.000804816	0.600238	Birc6	baculoviral IAP repeat-containing 6(Birc6)
D3Z1D3	0.00354783	0.600027	3425401B19Rik	RIKEN cDNA 3425401B19 gene(3425401B19Rik)
Q8C8R3	0.0292459	0.59964	Ank2	ankyrin 2, brain(Ank2)
P14142	0.0172363	0.599345	Slc2a4	solute carrier family 2 (facilitated glucose transporter), member 4(Slc2a4)
Q69ZX8	0.00177796	0.598903	Ablim3	actin binding LIM protein family, member 3(Ablim3)
Q9QZS8	0.0392941	0.598029	Sh2d3c	SH2 domain containing 3C(Sh2d3c)
Q8R4S0	1.03942e-06	0.597491	Ppp1r14c	protein phosphatase 1, regulatory inhibitor subunit 14C(Ppp1r14c)
Q149T7	0.000459225	0.597462	Ppm1j	protein phosphatase 1J(Ppm1j)
Q9JMD3	0.00226407	0.596302	Stard10	START domain containing 10(Stard10)
Q8R1B4	3.44154e-05	0.595582	Eif3c	eukaryotic translation initiation factor 3, subunit C(Eif3c)
P10637	1.23314e-06	0.595075	Mapt	microtubule-associated protein tau(Mapt)
O54988	0.00145607	0.595021	Slk	STE20-like kinase(Slk)
Q9CR86	7.96799e-05	0.594939	Carhsp1	calcium regulated heat stable protein 1(Carhsp1)
Q8BQZ4	0.00063988	0.592216	Ralgapb	Ral GTPase activating protein, beta subunit (non-catalytic)(Ralgapb)
Q00PI9	1.45204e-05	0.59196	Hnrnpul2	heterogeneous nuclear ribonucleoprotein U-like 2(Hnrnpul2)
Q8R550	0.0114819	0.591201	Sh3kbp1	SH3-domain kinase binding protein 1(Sh3kbp1)
Q8CEL2	0.0152937	0.590763	Cfap61	cilia and flagella associated protein 61(Cfap61)
P70288	0.0196859	0.589633	Hdac2	histone deacetylase 2(Hdac2)
O55022	0.00523381	0.588842	Pgrmc1	progesterone receptor membrane component 1(Pgrmc1)
Q62407	1.19897e-08	0.588367	Speg	SPEG complex locus(Speg)
Q8VCE2	4.32131e-05	0.587993	Gpn1	GPN-loop GTPase 1(Gpn1)
Q99LD4	0.00297608	0.587625	Gps1	G protein pathway suppressor 1(Gps1)
Q9JLV1	3.61362e-05	0.587232	Bag3	BCL2-associated athanogene 3(Bag3)
Q8K4L3	0.00149278	0.586822	Svil	supervillin(Svil)
P16283	0.000850415	0.58674	Slc4a3	solute carrier family 4 (anion exchanger), member 3(Slc4a3)
Q9QXZ0	0.000893357	0.585641	Macf1	microtubule-actin crosslinking factor 1(Macf1)
Q99LH9	0.000599054	0.585543	Sh3bp5l	SH3 binding domain protein 5 like(Sh3bp5l)
Q8BH50	0.000754536	0.584477	8030462N17Rik	RIKEN cDNA 8030462N17 gene(8030462N17Rik)
Q8N7N5	8.47915e-06	0.584227	Dcaf8	DDB1 and CUL4 associated factor 8(Dcaf8)
P51859	0.00247428	0.582306	Hdgf	heparin binding growth factor(Hdgf)
Q6PDM2	4.02553e-06	0.581944	Srsf1	serine and arginine-rich splicing factor 1(Srsf1)
O54774	3.13515e-06	0.580561	Ap3d1	adaptor-related protein complex 3, delta 1 subunit(Ap3d1)
Q99M51	0.000154063	0.578318	Nck1	non-catalytic region of tyrosine kinase adaptor protein 1(Nck1)
Q7TN99	0.00534971	0.576277	Cpeb3	cytoplasmic polyadenylation element binding protein 3(Cpeb3)
P61014	1.49525e-06	0.575511	Pln	phospholamban(Pln)
Q9JIX8	0.00740395	0.573924	Acin1	apoptotic chromatin condensation inducer 1(Acin1)
Q99L43	8.64245e-05	0.573524	Cds2	CDP-diacylglycerol synthase (phosphatidate cytidylyltransferase) 2(Cds2)
P52479	0.00591697	0.57069	Usp10	ubiquitin specific peptidase 10(Usp10)
Q9QYJ0	0.000142435	0.56996	Dnaja2	DnaJ heat shock protein family (Hsp40) member A2(Dnaja2)
P04627	0.0026818	0.568578	Araf	Araf proto-oncogene, serine/threonine kinase(Araf)
Q5DTM8	7.28301e-05	0.566645	Rnf20	ring finger protein 20(Rnf20)
Q9JKS4	0.000751351	0.565719	Ldb3	LIM domain binding 3(Ldb3)
Q9D0L7	0.0255605	0.564163	Armc10	armadillo repeat containing 10(Armc10)
Q8BZX4	0.000759268	0.559832	Srek1	splicing regulatory glutamine/lysine-rich protein 1(Srek1)
Q64338	5.86175e-05	0.558635	Pde1c	phosphodiesterase 1C(Pde1c)
Q9JMK2	1.60222e-06	0.558621	Csnk1e	casein kinase 1, epsilon(Csnk1e)
Q9DBG7	0.0472023	0.556286	Srpr	signal recognition particle receptor ('docking protein')(Srpr)
P30999	2.1063e-05	0.553237	Ctnnd1	catenin (cadherin associated protein), delta 1(Ctnnd1)
Q9DC77	1.41657e-05	0.551689	Smpx	small muscle protein, X-linked(Smpx)
Q60760	4.78236e-08	0.549786	Grb10	growth factor receptor bound protein 10(Grb10)
Q8CI08	1.02817e-07	0.547093	Slain2	SLAIN motif family, member 2(Slain2)
Q68FF6	0.000124529	0.545002	Git1	GIT ArfGAP 1(Git1)
Q9WUD1	0.0001242	0.543347	Stub1	STIP1 homology and U-Box containing protein 1(Stub1)
Q61033	0.000320287	0.543135	Tmpo	thymopoietin(Tmpo)
Q3UJB9	0.0209381	0.542352	Edc4	enhancer of mRNA decapping 4(Edc4)
Q9CRA5	3.03202e-05	0.541437	Golph3	golgi phosphoprotein 3(Golph3)
Q8CI95	0.000553864	0.536791	Osbpl11	oxysterol binding protein-like 11(Osbpl11)
P50136	7.39414e-08	0.536765	Bckdha	branched chain ketoacid dehydrogenase E1, alpha polypeptide(Bckdha)
Q7TQD2	1.79475e-06	0.535996	Tppp	tubulin polymerization promoting protein(Tppp)
Q3TIR3	1.71459e-05	0.534619	Ric8a	RIC8 guanine nucleotide exchange factor A(Ric8a)
Q99MR1	0.0415079	0.532931	Gigyf1	GRB10 interacting GYF protein 1(Gigyf1)
P26369	0.000243525	0.532787	U2af2	U2 small nuclear ribonucleoprotein auxiliary factor (U2AF) 2(U2af2)
A2A5R2	0.000118727	0.532066	Arfgef2	ADP-ribosylation factor guanine nucleotide-exchange factor 2 (brefeldin A-inhibited)(Arfgef2)
P50580	0.000452949	0.531711	Pa2g4	proliferation-associated 2G4(Pa2g4)
Q6NZJ6	4.04353e-08	0.531454	Eif4g1	eukaryotic translation initiation factor 4, gamma 1(Eif4g1)
O35379	0.00151585	0.529747	Abcc1	ATP-binding cassette, sub-family C (CFTR/MRP), member 1(Abcc1)
Q9D5T0	9.27805e-05	0.529607	Atad1	ATPase family, AAA domain containing 1(Atad1)
P45591	1.57023e-05	0.529112	Cfl2	cofilin 2, muscle(Cfl2)
Q8VDM6	0.00269762	0.527777	Hnrnpul1	heterogeneous nuclear ribonucleoprotein U-like 1(Hnrnpul1)
Q5BL07	0.000256584	0.523419	Pex1	peroxisomal biogenesis factor 1(Pex1)
Q8CJ61	0.000568992	0.522036	Cmtm4	CKLF-like MARVEL transmembrane domain containing 4(Cmtm4)
Q8C4Y3	0.00022198	0.521499	Nelfb	negative elongation factor complex member B(Nelfb)
Q8C6M1	0.000127473	0.518338	Usp20	ubiquitin specific peptidase 20(Usp20)
P54116	8.65306e-05	0.517678	Stom	stomatin(Stom)
Q9D394	0.000534313	0.516121	Rufy3	RUN and FYVE domain containing 3(Rufy3)
P98203	2.46478e-06	0.515098	Arvcf	armadillo repeat gene deleted in velocardiofacial syndrome(Arvcf)
Q7TSH2	3.17659e-05	0.51508	Phkb	phosphorylase kinase beta(Phkb)
Q9R020	1.64867e-05	0.514635	Zranb2	zinc finger, RAN-binding domain containing 2(Zranb2)
Q9CT10	1.48647e-05	0.513572	Ranbp3	RAN binding protein 3(Ranbp3)
Q9R0P5	1.89236e-06	0.507562	Dstn	destrin(Dstn)
Q3TZZ7	0.00796113	0.506114	Esyt2	extended synaptotagmin-like protein 2(Esyt2)
Q8C9H6	2.82791e-06	0.492711	Strip2	striatin interacting protein 2(Strip2)
Q9Z1D1	0.000263994	0.491027	Eif3g	eukaryotic translation initiation factor 3, subunit G(Eif3g)
Q9Z1Z0	0.00136784	0.489695	Uso1	USO1 vesicle docking factor(Uso1)
Q05BC3	2.35078e-05	0.488968	Eml1	echinoderm microtubule associated protein like 1(Eml1)
P51830	0.00124924	0.485095	Adcy9	adenylate cyclase 9(Adcy9)
Q8CBH5	9.8814e-05	0.4847	Mfsd6	major facilitator superfamily domain containing 6(Mfsd6)
Q80YV2	7.37533e-05	0.482897	Zc3hc1	zinc finger, C3HC type 1(Zc3hc1)
O70435	0.00021055	0.481225	Psma3	proteasome subunit alpha 3(Psma3)
P59017	2.49926e-06	0.480764	Bcl2l13	BCL2-like 13 (apoptosis facilitator)(Bcl2l13)
Q9D4H1	0.00021846	0.478439	Exoc2	exocyst complex component 2(Exoc2)
Q9Z2A0	0.000184779	0.477574	Pdpk1	3-phosphoinositide dependent protein kinase 1(Pdpk1)
Q8BUR4	0.00031758	0.477207	Dock1	dedicator of cytokinesis 1(Dock1)
Q8VHR5	1.60218e-06	0.473314	Gatad2b	GATA zinc finger domain containing 2B(Gatad2b)
Q3B7Z2	1.16953e-06	0.469993	Osbp	oxysterol binding protein(Osbp)
Q99L45	0.00907249	0.46997	Eif2s2	eukaryotic translation initiation factor 2, subunit 2 (beta)(Eif2s2)
Q9Z239	0.000103629	0.468194	Fxyd1	FXYD domain-containing ion transport regulator 1(Fxyd1)
Q9DC22	0.00208469	0.466067	Dcaf6	DDB1 and CUL4 associated factor 6(Dcaf6)
Q7TQ95	4.23044e-06	0.464011	Lnpk	lunapark, ER junction formation factor(Lnpk)
Q60876	0.00112441	0.463856	Eif4ebp1	eukaryotic translation initiation factor 4E binding protein 1(Eif4ebp1)
Q61586	0.000192525	0.46009	Gpam	glycerol-3-phosphate acyltransferase, mitochondrial(Gpam)
Q9WTK7	0.00788898	0.451482	Stk11	serine/threonine kinase 11(Stk11)
Q9WVR4	0.000284645	0.449026	Fxr2	FMR1 autosomal homolog 2(Fxr2)
Q8BR65	0.000493138	0.4481	Suds3	suppressor of defective silencing 3 homolog (S. cerevisiae)(Suds3)
Q3UHZ5	2.94365e-08	0.448013	Lmod2	leiomodin 2 (cardiac)(Lmod2)
Q8CDG3	9.88237e-05	0.447469	Vcpip1	valosin containing protein (p97)/p47 complex interacting protein 1(Vcpip1)
Q5H8C4	0.00895969	0.446659	Vps13a	vacuolar protein sorting 13A(Vps13a)
P35564	1.09705e-11	0.445228	Canx	calnexin(Canx)
Q61151	0.000189006	0.441993	Ppp2r5e	protein phosphatase 2, regulatory subunit B', epsilon(Ppp2r5e)
Q9Z1N9	6.7249e-06	0.435542	Unc13b	unc-13 homolog B(Unc13b)
Q9D6W8	0.00295568	0.429154	Borcs6	BLOC-1 related complex subunit 6(Borcs6)
O35071	6.25983e-05	0.427268	Kif1c	kinesin family member 1C(Kif1c)
Q5GIG6	0.000138926	0.420328	Tnni3k	TNNI3 interacting kinase(Tnni3k)
P56812	2.20648e-07	0.415744	Pdcd5	programmed cell death 5(Pdcd5)
Q6P9Q4	2.00538e-06	0.413804	Fhod1	formin homology 2 domain containing 1(Fhod1)
Q8CC27	5.32219e-05	0.413447	Cacnb2	calcium channel, voltage-dependent, beta 2 subunit(Cacnb2)
Q8K2K6	5.91133e-08	0.412586	Agfg1	ArfGAP with FG repeats 1(Agfg1)
Q05D44	0.00217607	0.408658	Eif5b	eukaryotic translation initiation factor 5B(Eif5b)
P39054	0.000196915	0.406766	Dnm2	dynamin 2(Dnm2)
P18760	0.000168673	0.393744	Cfl1	cofilin 1, non-muscle(Cfl1)
Q8K2L8	0.000210394	0.391435	Trappc12	trafficking protein particle complex 12(Trappc12)
Q91VK1	3.06776e-06	0.387995	Bzw2	basic leucine zipper and W2 domains 2(Bzw2)
Q9JKB3	1.94847e-05	0.385301	Ybx3	Y box protein 3(Ybx3)
Q9JJV9	0.00166397	0.381403	Scn5a	sodium channel, voltage-gated, type V, alpha(Scn5a)
Q8BVF2	0.000129335	0.377105	Pdcl3	phosducin-like 3(Pdcl3)
Q62433	1.41354e-05	0.368869	Ndrg1	N-myc downstream regulated gene 1(Ndrg1)
P59672	0.000535733	0.363759	Anks1	ankyrin repeat and SAM domain containing 1(Anks1)
Q91VC7	7.85698e-09	0.336524	Ppp1r14a	protein phosphatase 1, regulatory inhibitor subunit 14A(Ppp1r14a)
Q8BG67	1.95707e-05	0.319452	Efr3a	EFR3 homolog A(Efr3a)
Q8K1E6	6.4292e-06	0.303368	Alkbh3	alkB homolog 3, alpha-ketoglutarate-dependent dioxygenase(Alkbh3)

## Sheet: DEPP (MI-S~SO)
Protein-ID	p	FC	Gene-ID	Protein names
Q9DCC8	5.50171e-05	2.4773	Tomm20	translocase of outer mitochondrial membrane 20(Tomm20)
P17183	0.00213339	2.05156	Eno2	enolase 2, gamma neuronal(Eno2)
Q8R3V6	0.00130496	1.66817	Cuedc1	CUE domain containing 1(Cuedc1)
P01942	0.000109734	1.66372	Hba-a1	hemoglobin alpha, adult chain 1(Hba-a1)
P28650	0.00333275	1.65198	Adssl1	adenylosuccinate synthetase like 1(Adssl1)
P56393	2.46133e-06	1.64662	Cox7b	cytochrome c oxidase subunit 7B(Cox7b)
P14602	5.99484e-07	1.60857	Hspb1	heat shock protein 1(Hspb1)
P43023	4.05629e-05	1.59234	Cox6a2	cytochrome c oxidase subunit 6A2(Cox6a2)
Q9JIF9	0.000579384	1.51726	Myot	myotilin(Myot)
Q99MS7	2.43198e-05	1.51477	Ehbp1l1	EH domain binding protein 1-like 1(Ehbp1l1)
P84104	0.0308152	1.48287	Srsf3	serine and arginine-rich splicing factor 3(Srsf3)
P84244	0.000113298	1.45313	H3f3a	H3.3 histone A(H3f3a)
Q2KN98	0.024908	1.44203	Specc1l	sperm antigen with calponin homology and coiled-coil domains 1-like(Specc1l)
Q62261	0.000106833	1.43804	Sptbn1	spectrin beta, non-erythrocytic 1(Sptbn1)
Q6PDN3	0.0152801	1.43495	Mylk	myosin, light polypeptide kinase(Mylk)
Q7TQ95	9.29333e-05	1.4231	Lnpk	lunapark, ER junction formation factor(Lnpk)
O54962	0.00237995	1.41853	Banf1	BAF nuclear assembly factor 1(Banf1)
Q60930	0.0132292	1.41584	Vdac2	voltage-dependent anion channel 2(Vdac2)
Q8BGK2	0.015449	1.38891	Adprhl1	ADP-ribosylhydrolase like 1(Adprhl1)
P97825	0.00532767	1.38794	Jpt1	Jupiter microtubule associated homolog 1(Jpt1)
Q5EG47	0.00703202	1.38075	Prkaa1	protein kinase, AMP-activated, alpha 1 catalytic subunit(Prkaa1)
P19123	0.00598533	1.37604	Tnnc1	troponin C, cardiac/slow skeletal(Tnnc1)
P62806	0.00525884	1.37204	H4c14	H4 clustered histone 14(H4c14)
Q8CI51	0.000240868	1.37202	Pdlim5	PDZ and LIM domain 5(Pdlim5)
Q8R361	0.0383699	1.36336	Rab11fip5	RAB11 family interacting protein 5 (class I)(Rab11fip5)
Q8K4G5	0.000270595	1.35928	Ablim1	actin-binding LIM protein 1(Ablim1)
Q921I1	7.94122e-07	1.35905	Trf	transferrin(Trf)
O88532	0.00680377	1.34544	Zfr	zinc finger RNA binding protein(Zfr)
P31001	0.00783752	1.34309	Des	desmin(Des)
P02088	1.49318e-08	1.34152	Hbb-b1	hemoglobin, beta adult major chain(Hbb-b1)
Q62188	0.00153758	1.33935	Dpysl3	dihydropyrimidinase-like 3(Dpysl3)
Q61147	0.00321453	1.338	Cp	ceruloplasmin(Cp)
P43407	0.000478584	1.31948	Sdc2	syndecan 2(Sdc2)
Q80UP8	0.000911002	1.31494	Slc20a2	solute carrier family 20, member 2(Slc20a2)
Q3UHJ0	0.000103786	1.31113	Aak1	AP2 associated kinase 1(Aak1)
P46935	0.0043092	1.30857	Nedd4	neural precursor cell expressed, developmentally down-regulated 4(Nedd4)
P50752	0.000824213	1.30454	Tnnt2	troponin T2, cardiac(Tnnt2)
Q9DC77	0.0242862	1.29891	Smpx	small muscle protein, X-linked(Smpx)
Q9R269	0.0340261	1.29413	Ppl	periplakin(Ppl)
E9Q7G0	0.0169529	1.29238	Numa1	nuclear mitotic apparatus protein 1(Numa1)
Q3U1Y4	0.0328124	1.29177	Dennd4b	DENN/MADD domain containing 4B(Dennd4b)
P51885	0.00329106	1.28942	Lum	lumican(Lum)
G5E870	0.0112729	1.28387	Trip12	thyroid hormone receptor interactor 12(Trip12)
O70250	0.000400755	1.28148	Pgam2	phosphoglycerate mutase 2(Pgam2)
O70468	0.0121526	1.27939	Mybpc3	myosin binding protein C, cardiac(Mybpc3)
Q9D1G3	0.0072562	1.27823	Hhatl	hedgehog acyltransferase-like(Hhatl)
Q9Z0X1	0.00152893	1.27372	Aifm1	apoptosis-inducing factor, mitochondrion-associated 1(Aifm1)
P61021	0.00742369	1.27075	Rab5b	RAB5B, member RAS oncogene family(Rab5b)
P70698	0.00935592	1.26253	Ctps	cytidine 5'-triphosphate synthase(Ctps)
O70433	0.02627	1.26185	Fhl2	four and a half LIM domains 2(Fhl2)
Q8BGD9	0.0103487	1.25941	Eif4b	eukaryotic translation initiation factor 4B(Eif4b)
P54116	0.0345198	1.25913	Stom	stomatin(Stom)
P23927	0.00286368	1.25632	Cryab	crystallin, alpha B(Cryab)
Q9CZ44	0.00155744	1.25102	Nsfl1c	NSFL1 (p97) cofactor (p47)(Nsfl1c)
F6ZDS4	0.000693545	1.24664	Tpr	translocated promoter region, nuclear basket protein(Tpr)
Q91W69	0.0180909	1.24471	Epn3	epsin 3(Epn3)
Q8K0L0	0.0014352	1.23725	Asb2	ankyrin repeat and SOCS box-containing 2(Asb2)
Q6ZWY9	0.0177435	1.2341	H2bc4	H2B clustered histone 4(H2bc4)
Q9CPQ8	0.0204017	1.22519	Atp5l	ATP synthase, H+ transporting, mitochondrial F0 complex, subunit G(Atp5l)
Q02566	0.0183317	1.21624	Myh6	myosin, heavy polypeptide 6, cardiac muscle, alpha(Myh6)
P14094	0.00529636	1.21289	Atp1b1	ATPase, Na+/K+ transporting, beta 1 polypeptide(Atp1b1)
Q61234	0.0378575	1.21194	Snta1	syntrophin, acidic 1(Snta1)
Q9CRD0	0.0422906	1.2099	Ociad1	OCIA domain containing 1(Ociad1)
Q9DAK9	0.0210931	1.20644	Phpt1	phosphohistidine phosphatase 1(Phpt1)
O35609	0.00239098	1.20625	Scamp3	secretory carrier membrane protein 3(Scamp3)
P27773	0.0194557	1.20563	Pdia3	protein disulfide isomerase associated 3(Pdia3)
Q9QYY0	0.0269139	1.20523	Gab1	growth factor receptor bound protein 2-associated protein 1(Gab1)
Q8R4S0	0.0218858	0.830842	Ppp1r14c	protein phosphatase 1, regulatory inhibitor subunit 14C(Ppp1r14c)
Q99M51	0.00863345	0.827944	Nck1	non-catalytic region of tyrosine kinase adaptor protein 1(Nck1)
P51667	0.0288439	0.825129	Myl2	myosin, light polypeptide 2, regulatory, cardiac, slow(Myl2)
Q8CC27	0.0161	0.823759	Cacnb2	calcium channel, voltage-dependent, beta 2 subunit(Cacnb2)
Q8N7N5	0.0448038	0.823597	Dcaf8	DDB1 and CUL4 associated factor 8(Dcaf8)
Q9CQF4	0.0182921	0.823543	Mtres1	mitochondrial transcription rescue factor 1(Mtres1)
Q9JM73	0.022413	0.821788	Srf	serum response factor(Srf)
P09411	0.0054085	0.821677	Pgk1	phosphoglycerate kinase 1(Pgk1)
Q9CQZ6	0.0266907	0.816178	Ndufb3	NADH:ubiquinone oxidoreductase subunit B3(Ndufb3)
Q7TPW1	0.0253671	0.813176	Nexn	nexilin(Nexn)
Q6PD03	0.00913168	0.812101	Ppp2r5a	protein phosphatase 2, regulatory subunit B', alpha(Ppp2r5a)
Q91WD5	0.0167752	0.812073	Ndufs2	NADH:ubiquinone oxidoreductase core subunit S2(Ndufs2)
P62897	0.000285526	0.808542	Cycs	cytochrome c, somatic(Cycs)
Q9Z1E4	0.0120975	0.807844	Gys1	glycogen synthase 1, muscle(Gys1)
Q8R4N0	0.0093863	0.80701	Clybl	citrate lyase beta like(Clybl)
Q9QYG0	0.00628149	0.804895	Ndrg2	N-myc downstream regulated gene 2(Ndrg2)
O55143	0.000304309	0.803892	Atp2a2	ATPase, Ca++ transporting, cardiac muscle, slow twitch 2(Atp2a2)
Q9ES28	0.0495844	0.802311	Arhgef7	Rho guanine nucleotide exchange factor (GEF7)(Arhgef7)
Q07417	0.012771	0.800895	Acads	acyl-Coenzyme A dehydrogenase, short chain(Acads)
O09161	0.0326397	0.800258	Casq2	calsequestrin 2(Casq2)
Q9R0P4	0.0247166	0.799584	1110004F10Rik	RIKEN cDNA 1110004F10 gene(1110004F10Rik)
O35071	0.00883607	0.793101	Kif1c	kinesin family member 1C(Kif1c)
Q3UH68	0.000127585	0.790738	Limch1	LIM and calponin homology domains 1(Limch1)
O88738	0.041202	0.788425	Birc6	baculoviral IAP repeat-containing 6(Birc6)
Q9ES83	0.0110142	0.787925	Bves	blood vessel epicardial substance(Bves)
Q99L43	0.0400099	0.787683	Cds2	CDP-diacylglycerol synthase (phosphatidate cytidylyltransferase) 2(Cds2)
Q61207	0.00370745	0.785078	Psap	prosaposin(Psap)
P35831	0.0421823	0.784361	Ptpn12	protein tyrosine phosphatase, non-receptor type 12(Ptpn12)
O70435	0.0124383	0.782172	Psma3	proteasome subunit alpha 3(Psma3)
P97792	0.0189667	0.780985	Cxadr	coxsackie virus and adenovirus receptor(Cxadr)
P45591	0.0389025	0.779589	Cfl2	cofilin 2, muscle(Cfl2)
Q91YE8	0.0334591	0.779536	Synpo2	synaptopodin 2(Synpo2)
Q8BZF8	0.0343234	0.770854	Pgm5	phosphoglucomutase 5(Pgm5)
Q9D0B0	0.00527981	0.770528	Srsf9	serine and arginine-rich splicing factor 9(Srsf9)
P35486	0.00162562	0.76695	Pdha1	pyruvate dehydrogenase E1 alpha 1(Pdha1)
Q8K2K6	0.0188357	0.76277	Agfg1	ArfGAP with FG repeats 1(Agfg1)
Q6P4S6	0.0283104	0.760884	Sik3	SIK family kinase 3(Sik3)
P60904	0.0292438	0.760291	Dnajc5	DnaJ heat shock protein family (Hsp40) member C5(Dnajc5)
P68404	0.00343852	0.758352	Prkcb	protein kinase C, beta(Prkcb)
P62880	0.0044512	0.756122	Gnb2	guanine nucleotide binding protein (G protein), beta 2(Gnb2)
Q9QXZ0	0.034522	0.755221	Macf1	microtubule-actin crosslinking factor 1(Macf1)
O09044	0.00635968	0.754783	Snap23	synaptosomal-associated protein 23(Snap23)
C0HKD9	0.0117237	0.754265	Mfap1b	microfibrillar-associated protein 1B(Mfap1b)
Q8VHR5	0.00627343	0.75228	Gatad2b	GATA zinc finger domain containing 2B(Gatad2b)
Q8BR65	0.0213707	0.752071	Suds3	suppressor of defective silencing 3 homolog (S. cerevisiae)(Suds3)
P50462	0.000730574	0.75073	Csrp3	cysteine and glycine-rich protein 3(Csrp3)
Q9WUD1	0.00224653	0.749509	Stub1	STIP1 homology and U-Box containing protein 1(Stub1)
Q921F4	0.0173779	0.748837	Hnrnpll	heterogeneous nuclear ribonucleoprotein L-like(Hnrnpll)
Q60929	0.00158356	0.747449	Mef2a	myocyte enhancer factor 2A(Mef2a)
Q8BVF2	0.0116434	0.744515	Pdcl3	phosducin-like 3(Pdcl3)
P51125	0.00703901	0.736343	Cast	calpastatin(Cast)
Q9Z1Z0	0.0264155	0.734032	Uso1	USO1 vesicle docking factor(Uso1)
Q61586	0.0324179	0.733695	Gpam	glycerol-3-phosphate acyltransferase, mitochondrial(Gpam)
Q07113	0.0172569	0.732971	Igf2r	insulin-like growth factor 2 receptor(Igf2r)
Q3TIR3	0.00603611	0.728185	Ric8a	RIC8 guanine nucleotide exchange factor A(Ric8a)
Q8K4Q0	0.00117146	0.719582	Rptor	regulatory associated protein of MTOR, complex 1(Rptor)
Q9CQX8	0.0428345	0.716773	Mrps36	mitochondrial ribosomal protein S36(Mrps36)
Q64096	0.0265187	0.714614	Mcf2l	mcf.2 transforming sequence-like(Mcf2l)
Q8R1I1	0.00127667	0.713226	Uqcr10	ubiquinol-cytochrome c reductase, complex III subunit X(Uqcr10)
Q8R344	0.009489	0.712393	Ccdc12	coiled-coil domain containing 12(Ccdc12)
Q8VDM6	0.0323086	0.711091	Hnrnpul1	heterogeneous nuclear ribonucleoprotein U-like 1(Hnrnpul1)
Q7TSH2	0.000696082	0.705809	Phkb	phosphorylase kinase beta(Phkb)
P50136	0.000163481	0.70515	Bckdha	branched chain ketoacid dehydrogenase E1, alpha polypeptide(Bckdha)
P70404	0.00448861	0.704718	Idh3g	isocitrate dehydrogenase 3 (NAD+), gamma(Idh3g)
P56812	8.34089e-06	0.702296	Pdcd5	programmed cell death 5(Pdcd5)
Q62433	0.028323	0.701504	Ndrg1	N-myc downstream regulated gene 1(Ndrg1)
P68181	0.0217426	0.695711	Prkacb	protein kinase, cAMP dependent, catalytic, beta(Prkacb)
P68033	0.00195621	0.693715	Actc1	actin, alpha, cardiac muscle 1(Actc1)
Q7TQD2	0.000934517	0.688583	Tppp	tubulin polymerization promoting protein(Tppp)
Q64735	0.00603248	0.685051	Cr1l	complement component (3b/4b) receptor 1-like(Cr1l)
O35379	0.0284172	0.67879	Abcc1	ATP-binding cassette, sub-family C (CFTR/MRP), member 1(Abcc1)
Q8K2L8	0.0107403	0.678473	Trappc12	trafficking protein particle complex 12(Trappc12)
Q3B7Z2	1.59162e-05	0.675472	Osbp	oxysterol binding protein(Osbp)
Q9JJV9	0.034574	0.668384	Scn5a	sodium channel, voltage-gated, type V, alpha(Scn5a)
Q8CI95	0.0037437	0.665453	Osbpl11	oxysterol binding protein-like 11(Osbpl11)
P51830	0.010231	0.66542	Adcy9	adenylate cyclase 9(Adcy9)
P68368	0.0318571	0.658991	Tuba4a	tubulin, alpha 4A(Tuba4a)
Q8BGC0	0.00634099	0.658424	Htatsf1	HIV TAT specific factor 1(Htatsf1)
P62821	0.00167751	0.658068	Rab1a	RAB1A, member RAS oncogene family(Rab1a)
Q63918	0.000207716	0.655555	Cavin2	caveolae associated 2(Cavin2)
P35564	1.06794e-06	0.652173	Canx	calnexin(Canx)
P18760	0.0221088	0.64832	Cfl1	cofilin 1, non-muscle(Cfl1)
P46938	0.0278658	0.644243	Yap1	yes-associated protein 1(Yap1)
Q9Z1D1	0.00161646	0.641083	Eif3g	eukaryotic translation initiation factor 3, subunit G(Eif3g)
P16283	0.00197958	0.628307	Slc4a3	solute carrier family 4 (anion exchanger), member 3(Slc4a3)
Q8C9H6	2.15818e-05	0.6256	Strip2	striatin interacting protein 2(Strip2)
Q8CC88	0.00197894	0.604092	Vwa8	von Willebrand factor A domain containing 8(Vwa8)
Q91VK1	3.69789e-05	0.602533	Bzw2	basic leucine zipper and W2 domains 2(Bzw2)
P59672	0.00673295	0.59771	Anks1	ankyrin repeat and SAM domain containing 1(Anks1)
Q60876	0.0133593	0.592294	Eif4ebp1	eukaryotic translation initiation factor 4E binding protein 1(Eif4ebp1)
Q9D6W8	0.0150557	0.585864	Borcs6	BLOC-1 related complex subunit 6(Borcs6)
Q6P542	0.00672106	0.58314	Abcf1	ATP-binding cassette, sub-family F (GCN20), member 1(Abcf1)
Q8C4Y3	0.000424219	0.576063	Nelfb	negative elongation factor complex member B(Nelfb)
Q99P72	0.00107306	0.572578	Rtn4	reticulon 4(Rtn4)
Q3UHZ5	7.61559e-06	0.569192	Lmod2	leiomodin 2 (cardiac)(Lmod2)
Q9Z2A0	0.000511434	0.565871	Pdpk1	3-phosphoinositide dependent protein kinase 1(Pdpk1)
P39054	0.00114149	0.564535	Dnm2	dynamin 2(Dnm2)
Q9EST5	3.69895e-05	0.554795	Anp32b	acidic (leucine-rich) nuclear phosphoprotein 32 family, member B(Anp32b)
P52479	0.00365391	0.546156	Usp10	ubiquitin specific peptidase 10(Usp10)
Q60597	0.00241392	0.545325	Ogdh	oxoglutarate (alpha-ketoglutarate) dehydrogenase (lipoamide)(Ogdh)
Q8BXA1	0.00853796	0.539889	Golim4	golgi integral membrane protein 4(Golim4)
Q9D1G1	0.000158153	0.534228	Rab1b	RAB1B, member RAS oncogene family(Rab1b)
Q8K1E6	0.00111446	0.53323	Alkbh3	alkB homolog 3, alpha-ketoglutarate-dependent dioxygenase(Alkbh3)
Q3TZZ7	0.0142059	0.522278	Esyt2	extended synaptotagmin-like protein 2(Esyt2)
P0DP28	7.99681e-05	0.522273	Calm3	calmodulin 3(Calm3)
Q91VC7	1.64513e-05	0.511606	Ppp1r14a	protein phosphatase 1, regulatory inhibitor subunit 14A(Ppp1r14a)
Q3UJB9	0.0127205	0.505712	Edc4	enhancer of mRNA decapping 4(Edc4)
P61979	0.0388685	0.500775	Hnrnpk	heterogeneous nuclear ribonucleoprotein K(Hnrnpk)
Q9WVR4	0.00042389	0.485329	Fxr2	FMR1 autosomal homolog 2(Fxr2)
Q05BC3	2.10336e-05	0.47914	Eml1	echinoderm microtubule associated protein like 1(Eml1)
Q8BG67	5.57644e-05	0.41624	Efr3a	EFR3 homolog A(Efr3a)
P00397	0.000386549	0.408189	mt-Co1	cytochrome c oxidase I, mitochondrial(mt-Co1)
P68372	0.00265562	0.393237	Tubb4b	tubulin, beta 4B class IVB(Tubb4b)
A2ASS6	0.000200295	0.372221	Ttn	titin(Ttn)
Q9JI91	0.0461824	0.302732	Actn2	actinin alpha 2(Actn2)

## Sheet: DEPP (MT-MI~SO)
Protein-ID	p	FC	Gene-ID	Protein names
Q8R001	3.63229e-05	2.27367	Mapre2	microtubule-associated protein, RP/EB family, member 2(Mapre2)
Q8R1Q8	0.00202258	2.26593	Dync1li1	dynein cytoplasmic 1 light intermediate chain 1(Dync1li1)
P28650	8.07699e-05	2.10219	Adssl1	adenylosuccinate synthetase like 1(Adssl1)
O70373	4.70583e-07	2.05059	Xirp1	xin actin-binding repeat containing 1(Xirp1)
P02088	0.000812098	1.88614	Hbb-b1	hemoglobin, beta adult major chain(Hbb-b1)
Q8C052	4.18739e-05	1.7073	Map1s	microtubule-associated protein 1S(Map1s)
P47757	0.000399987	1.69523	Capzb	capping protein (actin filament) muscle Z-line, beta(Capzb)
P84104	0.0060803	1.68221	Srsf3	serine and arginine-rich splicing factor 3(Srsf3)
P09411	7.05354e-07	1.67412	Pgk1	phosphoglycerate kinase 1(Pgk1)
Q9QYS9	0.0219635	1.66275	Qki	quaking, KH domain containing RNA binding(Qki)
Q63932	0.0180483	1.66249	Map2k2	mitogen-activated protein kinase kinase 2(Map2k2)
P48678	0.0122687	1.62953	Lmna	lamin A(Lmna)
P46935	1.39289e-05	1.61065	Nedd4	neural precursor cell expressed, developmentally down-regulated 4(Nedd4)
Q8K0L0	5.11293e-07	1.59685	Asb2	ankyrin repeat and SOCS box-containing 2(Asb2)
Q62523	0.00119149	1.5917	Zyx	zyxin(Zyx)
Q922H1	0.0464064	1.53676	Prmt3	protein arginine N-methyltransferase 3(Prmt3)
P62897	0.00551409	1.50721	Cycs	cytochrome c, somatic(Cycs)
P31001	0.000589845	1.49364	Des	desmin(Des)
Q91YN9	0.000620018	1.4643	Bag2	BCL2-associated athanogene 2(Bag2)
P59644	0.000353709	1.46143	Inpp5j	inositol polyphosphate 5-phosphatase J(Inpp5j)
Q3U1Y4	0.00418508	1.44379	Dennd4b	DENN/MADD domain containing 4B(Dennd4b)
P07758	0.0431269	1.43416	Serpina1a	serine (or cysteine) peptidase inhibitor, clade A, member 1A(Serpina1a)
Q9JKS4	0.00437338	1.42857	Ldb3	LIM domain binding 3(Ldb3)
P26041	0.000807743	1.42067	Msn	moesin(Msn)
Q8BK08	0.00572163	1.41161	Tmem11	transmembrane protein 11(Tmem11)
Q3UHJ0	6.17686e-06	1.40665	Aak1	AP2 associated kinase 1(Aak1)
Q3UMF0	0.00033281	1.40062	Cobll1	Cobl-like 1(Cobll1)
P56393	0.00030885	1.39652	Cox7b	cytochrome c oxidase subunit 7B(Cox7b)
Q52KR3	0.000480642	1.38906	Prune2	prune homolog 2(Prune2)
P14602	0.00011444	1.38214	Hspb1	heat shock protein 1(Hspb1)
Q8K1H7	0.00494722	1.38044	Tcp11l2	t-complex 11 (mouse) like 2(Tcp11l2)
Q8R3V6	0.00998057	1.37518	Cuedc1	CUE domain containing 1(Cuedc1)
Q8C0E2	0.0152374	1.37448	Vps26b	VPS26 retromer complex component B(Vps26b)
Q9JIF9	0.00379144	1.37135	Myot	myotilin(Myot)
P68368	0.0436866	1.36509	Tuba4a	tubulin, alpha 4A(Tuba4a)
Q8R361	0.0398717	1.35917	Rab11fip5	RAB11 family interacting protein 5 (class I)(Rab11fip5)
E9Q7G0	0.00926807	1.35839	Numa1	nuclear mitotic apparatus protein 1(Numa1)
Q3UIU2	0.0299995	1.35577	Ndufb6	NADH:ubiquinone oxidoreductase subunit B6(Ndufb6)
Q91YE8	7.49571e-05	1.34589	Synpo2	synaptopodin 2(Synpo2)
A2AN08	0.019853	1.34487	Ubr4	ubiquitin protein ligase E3 component n-recognin 4(Ubr4)
Q99K70	0.00206014	1.34308	Rragc	Ras-related GTP binding C(Rragc)
O88587	0.00487767	1.34079	Comt	catechol-O-methyltransferase(Comt)
P51667	0.0182384	1.33318	Myl2	myosin, light polypeptide 2, regulatory, cardiac, slow(Myl2)
Q8K4G5	0.000585353	1.32949	Ablim1	actin-binding LIM protein 1(Ablim1)
P70333	0.000830858	1.32921	Hnrnph2	heterogeneous nuclear ribonucleoprotein H2(Hnrnph2)
P23927	0.000389846	1.32791	Cryab	crystallin, alpha B(Cryab)
Q8VCF0	0.0203792	1.32613	Mavs	mitochondrial antiviral signaling protein(Mavs)
P70349	0.000189084	1.32228	Hint1	histidine triad nucleotide binding protein 1(Hint1)
P54116	0.016511	1.31489	Stom	stomatin(Stom)
Q9CYT6	0.00698278	1.31417	Cap2	CAP, adenylate cyclase-associated protein, 2 (yeast)(Cap2)
P62880	0.00332962	1.30919	Gnb2	guanine nucleotide binding protein (G protein), beta 2(Gnb2)
Q8BR65	0.0271575	1.30246	Suds3	suppressor of defective silencing 3 homolog (S. cerevisiae)(Suds3)
Q9D1G3	0.00478622	1.30028	Hhatl	hedgehog acyltransferase-like(Hhatl)
Q6P9Q4	0.000249185	1.29912	Fhod1	formin homology 2 domain containing 1(Fhod1)
Q9CR86	0.0183442	1.29675	Carhsp1	calcium regulated heat stable protein 1(Carhsp1)
Q3TGW2	0.0186675	1.29373	Eepd1	endonuclease/exonuclease/phosphatase family domain containing 1(Eepd1)
Q6PDN3	0.0458713	1.28938	Mylk	myosin, light polypeptide kinase(Mylk)
P12367	0.0107877	1.28633	Prkar2a	protein kinase, cAMP dependent regulatory, type II alpha(Prkar2a)
Q8C6M1	0.00511119	1.28421	Usp20	ubiquitin specific peptidase 20(Usp20)
Q8BSU7	0.00048266	1.2837	Mob3a	MOB kinase activator 3A(Mob3a)
P54731	0.00151235	1.28292	Faf1	Fas-associated factor 1(Faf1)
Q8VHX6	0.0133133	1.28281	Flnc	filamin C, gamma(Flnc)
Q62261	0.00435094	1.27914	Sptbn1	spectrin beta, non-erythrocytic 1(Sptbn1)
P43023	0.013187	1.2737	Cox6a2	cytochrome c oxidase subunit 6A2(Cox6a2)
Q99LY9	0.0176118	1.27314	Ndufs5	NADH:ubiquinone oxidoreductase core subunit S5(Ndufs5)
P14211	0.00348028	1.27308	Calr	calreticulin(Calr)
Q62376	0.0271612	1.26787	Snrnp70	small nuclear ribonucleoprotein 70 (U1)(Snrnp70)
O88342	0.0229526	1.2673	Wdr1	WD repeat domain 1(Wdr1)
Q80W47	0.000703925	1.26725	Wipi2	WD repeat domain, phosphoinositide interacting 2(Wipi2)
Q9R020	0.000952551	1.26682	Zranb2	zinc finger, RAN-binding domain containing 2(Zranb2)
P97825	0.0342479	1.26435	Jpt1	Jupiter microtubule associated homolog 1(Jpt1)
Q8BVF2	0.0250668	1.26351	Pdcl3	phosducin-like 3(Pdcl3)
P51885	0.00620601	1.26112	Lum	lumican(Lum)
P19123	0.0383506	1.26065	Tnnc1	troponin C, cardiac/slow skeletal(Tnnc1)
P29699	0.0289935	1.25898	Ahsg	alpha-2-HS-glycoprotein(Ahsg)
Q60929	0.0262257	1.25729	Mef2a	myocyte enhancer factor 2A(Mef2a)
O70250	0.000859981	1.25724	Pgam2	phosphoglycerate mutase 2(Pgam2)
Q3UTJ2	2.37084e-05	1.25271	Sorbs2	sorbin and SH3 domain containing 2(Sorbs2)
Q9ET54	0.004704	1.25168	Palld	palladin, cytoskeletal associated protein(Palld)
O70433	0.0303834	1.24854	Fhl2	four and a half LIM domains 2(Fhl2)
Q01768	0.000101938	1.24522	Nme2	NME/NM23 nucleoside diphosphate kinase 2(Nme2)
P27773	0.0114851	1.24468	Pdia3	protein disulfide isomerase associated 3(Pdia3)
Q62188	0.0132643	1.2439	Dpysl3	dihydropyrimidinase-like 3(Dpysl3)
P61021	0.0141928	1.24009	Rab5b	RAB5B, member RAS oncogene family(Rab5b)
F6ZDS4	0.000877603	1.23998	Tpr	translocated promoter region, nuclear basket protein(Tpr)
Q60953	0.00324174	1.2397	Pml	promyelocytic leukemia(Pml)
P52480	0.00526521	1.2373	Pkm	pyruvate kinase, muscle(Pkm)
P26231	0.0110721	1.23074	Ctnna1	catenin (cadherin associated protein), alpha 1(Ctnna1)
Q9QZQ1	0.0254072	1.2301	Afdn	afadin, adherens junction formation factor(Afdn)
E9Q4Z2	0.0029839	1.22864	Acacb	acetyl-Coenzyme A carboxylase beta(Acacb)
P45376	0.0152006	1.22853	Akr1b3	aldo-keto reductase family 1, member B3 (aldose reductase)(Akr1b3)
Q9Z0X1	0.00549431	1.22789	Aifm1	apoptosis-inducing factor, mitochondrion-associated 1(Aifm1)
P00416	0.00289411	1.22613	mt-Co3	cytochrome c oxidase III, mitochondrial(mt-Co3)
Q3UHD3	0.000987081	1.22588	Mtus2	microtubule associated tumor suppressor candidate 2(Mtus2)
O70468	0.0353716	1.22343	Mybpc3	myosin binding protein C, cardiac(Mybpc3)
Q9Z2C4	0.0383968	1.22006	Mtmr1	myotubularin related protein 1(Mtmr1)
Q9CXJ4	0.0371404	1.21982	Abcb8	ATP-binding cassette, sub-family B (MDR/TAP), member 8(Abcb8)
Q3UPL0	0.00908653	1.21974	Sec31a	Sec31 homolog A (S. cerevisiae)(Sec31a)
Q61234	0.0331615	1.2186	Snta1	syntrophin, acidic 1(Snta1)
Q5GIG6	0.0313439	1.2178	Tnni3k	TNNI3 interacting kinase(Tnni3k)
P53690	0.0211849	1.21154	Mmp14	matrix metallopeptidase 14 (membrane-inserted)(Mmp14)
Q6PDM2	0.0317629	1.2111	Srsf1	serine and arginine-rich splicing factor 1(Srsf1)
P07724	0.048795	1.21028	Alb	albumin(Alb)
P48787	0.00324235	1.20805	Tnni3	troponin I, cardiac 3(Tnni3)
Q9CZJ2	0.000262917	1.20503	Hspa12b	heat shock protein 12B(Hspa12b)
P84244	0.00845253	1.20366	H3f3a	H3.3 histone A(H3f3a)
Q9QXG4	0.0133862	1.20153	Acss2	acyl-CoA synthetase short-chain family member 2(Acss2)
Q9JHU2	0.00407572	1.20109	Palmd	palmdelphin(Palmd)
P68033	0.00193516	0.829994	Actc1	actin, alpha, cardiac muscle 1(Actc1)
Q8C4Y3	0.0208117	0.827069	Nelfb	negative elongation factor complex member B(Nelfb)
Q9Z1D1	0.0291799	0.822913	Eif3g	eukaryotic translation initiation factor 3, subunit G(Eif3g)
Q9D051	0.000171056	0.819302	Pdhb	pyruvate dehydrogenase (lipoamide) beta(Pdhb)
Q8R4N0	0.0103679	0.811913	Clybl	citrate lyase beta like(Clybl)
P50136	0.0120223	0.811702	Bckdha	branched chain ketoacid dehydrogenase E1, alpha polypeptide(Bckdha)
Q8R1I1	0.0167078	0.810454	Uqcr10	ubiquinol-cytochrome c reductase, complex III subunit X(Uqcr10)
P68404	0.0189221	0.807205	Prkcb	protein kinase C, beta(Prkcb)
Q61207	0.007901	0.804601	Psap	prosaposin(Psap)
P18242	0.0286218	0.803396	Ctsd	cathepsin D(Ctsd)
Q08857	0.0266171	0.80223	Cd36	CD36 molecule(Cd36)
P50462	0.00630465	0.800784	Csrp3	cysteine and glycine-rich protein 3(Csrp3)
Q9D7B6	0.00695957	0.795818	Acad8	acyl-Coenzyme A dehydrogenase family, member 8(Acad8)
Q8JZQ2	0.00178601	0.786404	Afg3l2	AFG3-like AAA ATPase 2(Afg3l2)
O09161	0.0200554	0.782512	Casq2	calsequestrin 2(Casq2)
Q9Z2A0	0.0103419	0.776175	Pdpk1	3-phosphoinositide dependent protein kinase 1(Pdpk1)
Q9Z1Z0	0.0461609	0.773369	Uso1	USO1 vesicle docking factor(Uso1)
P39054	0.0199261	0.772699	Dnm2	dynamin 2(Dnm2)
Q9CQZ6	0.00593824	0.761706	Ndufb3	NADH:ubiquinone oxidoreductase subunit B3(Ndufb3)
Q64735	0.0331248	0.760628	Cr1l	complement component (3b/4b) receptor 1-like(Cr1l)
Q8CC88	0.0332681	0.750519	Vwa8	von Willebrand factor A domain containing 8(Vwa8)
Q7TQ95	0.000195676	0.746742	Lnpk	lunapark, ER junction formation factor(Lnpk)
P47738	0.012085	0.744153	Aldh2	aldehyde dehydrogenase 2, mitochondrial(Aldh2)
Q99PL5	0.00490023	0.743196	Rrbp1	ribosome binding protein 1(Rrbp1)
O35855	0.0142282	0.742191	Bcat2	branched chain aminotransferase 2, mitochondrial(Bcat2)
Q9EST5	0.0133689	0.738355	Anp32b	acidic (leucine-rich) nuclear phosphoprotein 32 family, member B(Anp32b)
Q91VK1	0.000259665	0.734127	Bzw2	basic leucine zipper and W2 domains 2(Bzw2)
Q64096	0.0310259	0.72312	Mcf2l	mcf.2 transforming sequence-like(Mcf2l)
Q9WUD1	0.00130172	0.71665	Stub1	STIP1 homology and U-Box containing protein 1(Stub1)
P62821	0.00654206	0.710965	Rab1a	RAB1A, member RAS oncogene family(Rab1a)
Q6ZWY9	0.00255895	0.695243	H2bc4	H2B clustered histone 4(H2bc4)
P59017	0.00511593	0.693963	Bcl2l13	BCL2-like 13 (apoptosis facilitator)(Bcl2l13)
P51125	0.00118997	0.609665	Cast	calpastatin(Cast)
Q60597	0.00661818	0.594893	Ogdh	oxoglutarate (alpha-ketoglutarate) dehydrogenase (lipoamide)(Ogdh)
Q05BC3	7.96581e-05	0.591049	Eml1	echinoderm microtubule associated protein like 1(Eml1)
A2ASS6	0.00281303	0.572748	Ttn	titin(Ttn)
Q9D1G1	0.000222558	0.562884	Rab1b	RAB1B, member RAS oncogene family(Rab1b)
P0DP28	0.000100178	0.529629	Calm3	calmodulin 3(Calm3)
P00397	0.00458872	0.516855	mt-Co1	cytochrome c oxidase I, mitochondrial(mt-Co1)

## Sheet: DEPP(TG-MI~SO)
Protein-ID	p	FC	Gene-ID	Protein names
A0A5F8MPC7	0.0328098	3.23898	Casz1	castor zinc finger 1(Casz1)
P50580	0.0176293	2.99189	Pa2g4	proliferation-associated 2G4(Pa2g4)
Q99K70	0.0118146	2.90899	Rragc	Ras-related GTP binding C(Rragc)
Q6P9Q4	9.22862e-11	2.5936	Fhod1	formin homology 2 domain containing 1(Fhod1)
Q921L6	0.0280672	2.5235	Cttn	cortactin(Cttn)
E9QKG6	0.040427	2.32333	Ankrd17	ankyrin repeat domain 17(Ankrd17)
D3YVW2	5.47954e-05	2.2842	Golim4	golgi integral membrane protein 4(Golim4)
B7ZNX6	5.3115e-05	2.2776	Erbin	Erbb2 interacting protein(Erbin)
P59325	7.63027e-06	2.2738	Eif5	eukaryotic translation initiation factor 5(Eif5)
F8WI88	0.00772752	2.1988	Pcnp	PEST proteolytic signal containing nuclear protein(Pcnp)
P97855	0.0206585	2.15806	G3bp1	GTPase activating protein (SH3 domain) binding protein 1(G3bp1)
O70572	0.00542797	2.121	Smpd2	sphingomyelin phosphodiesterase 2, neutral(Smpd2)
Q9D6J1	9.18165e-06	2.055	Cers4	ceramide synthase 4(Cers4)
E0CX69	0.02742	2.04937	Itih2	inter-alpha trypsin inhibitor, heavy chain 2(Itih2)
Q8BZ52	0.000188552	2.0456	Fsd2	fibronectin type III and SPRY domain containing 2(Fsd2)
Q14C51	0.0474623	1.98254	Ptcd3	pentatricopeptide repeat domain 3(Ptcd3)
Q60520	1.54589e-07	1.9698	Sin3a	transcriptional regulator, SIN3A (yeast)(Sin3a)
Q9CQ22	0.0140786	1.9656	Lamtor1	late endosomal/lysosomal adaptor, MAPK and MTOR activator 1(Lamtor1)
Q8BVN4	0.0124209	1.9304	Mterf4	mitochondrial transcription termination factor 4(Mterf4)
Q9JMG7	2.18082e-05	1.9084	Hdgfl3	HDGF like 3(Hdgfl3)
O70318	0.00657898	1.89628	Epb41l2	erythrocyte membrane protein band 4.1 like 2(Epb41l2)
Q99L45	0.00139604	1.89236	Eif2s2	eukaryotic translation initiation factor 2, subunit 2 (beta)(Eif2s2)
P09405	6.11161e-05	1.8896	Ncl	nucleolin(Ncl)
Q65CL1	0.0259991	1.86332	Ctnna3	catenin (cadherin associated protein), alpha 3(Ctnna3)
Q8VHR5	0.0176479	1.7876	Gatad2b	GATA zinc finger domain containing 2B(Gatad2b)
Q8CH18	0.0207931	1.787	Ccar1	cell division cycle and apoptosis regulator 1(Ccar1)
P46467	0.000370431	1.7743	Vps4b	vacuolar protein sorting 4B(Vps4b)
E9PXR3	0.0322496	1.7686	Sesn1	sestrin 1(Sesn1)
P03903	0.0233327	1.7552	mt-Nd4l	NADH dehydrogenase 4L, mitochondrial(mt-Nd4l)
Q9D8T4	0.000465762	1.754	Tvp23b	trans-golgi network vesicle protein 23B(Tvp23b)
O35218	0.000684998	1.7226	Cpsf2	cleavage and polyadenylation specific factor 2(Cpsf2)
A3KGH5	0.0487854	1.7199	Rmdn3	regulator of microtubule dynamics 3(Rmdn3)
Q3USH5	0.0481667	1.71476	Sfswap	splicing factor SWAP(Sfswap)
P47955	6.80277e-08	1.7051	Rplp1	ribosomal protein, large, P1(Rplp1)
Q8R344	0.000155238	1.7032	Ccdc12	coiled-coil domain containing 12(Ccdc12)
Q8BVF2	4.69636e-08	1.6651	Pdcl3	phosducin-like 3(Pdcl3)
P70445	0.0360953	1.663	Eif4ebp2	eukaryotic translation initiation factor 4E binding protein 2(Eif4ebp2)
G5DDB7	0.0403124	1.662	Plcd1	phospholipase C, delta 1(Plcd1)
Q9EQQ9	0.00465029	1.6602	Oga	O-GlcNAcase(Oga)
A0A1D5RMM8	0.0147159	1.65393	Pxn	paxillin(Pxn)
Q3UHX2	0.0139268	1.64867	Pdap1	PDGFA associated protein 1(Pdap1)
Q91VK1	6.09146e-05	1.6439	Bzw2	basic leucine zipper and W2 domains 2(Bzw2)
Q61554	0.0493603	1.60747	Fbn1	fibrillin 1(Fbn1)
P60335	0.0336028	1.60233	Pcbp1	poly(rC) binding protein 1(Pcbp1)
O70480	0.000965085	1.5992	Vamp4	vesicle-associated membrane protein 4(Vamp4)
G5E8J4	0.000961405	1.5793	Ptpn21	protein tyrosine phosphatase, non-receptor type 21(Ptpn21)
F8VPZ1	0.00764294	1.5688	Trim63	tripartite motif-containing 63(Trim63)
B7ZNY3	0.00221716	1.56637	Pard3	par-3 family cell polarity regulator(Pard3)
Q9JLV1	0.0378094	1.55777	Bag3	BCL2-associated athanogene 3(Bag3)
Q9QZI8	0.0149858	1.5468	Serinc1	serine incorporator 1(Serinc1)
A0A5F8MPY2	0.000498674	1.5176	Rplp2-ps1	ribosomal protein, large P2, pseudogene 1(Rplp2-ps1)
Q4VBD2	0.0448081	1.5124	Tapt1	transmembrane anterior posterior transformation 1(Tapt1)
Q7TNV0	0.0280411	1.48333	Dek	DEK proto-oncogene (DNA binding)(Dek)
Q6PAM0	0.0131093	1.45373	Prkab2	protein kinase, AMP-activated, beta 2 non-catalytic subunit(Prkab2)
J3QNK8	0.00420865	1.4535	Abi1	abl interactor 1(Abi1)
Q8VDQ8	0.0266562	1.45233	Sirt2	sirtuin 2(Sirt2)
Q62018	0.0320215	1.45233	Ctr9	CTR9 homolog, Paf1/RNA polymerase II complex component(Ctr9)
E9Q1V9	0.00572719	1.44925	Camk2d	calcium/calmodulin-dependent protein kinase II, delta(Camk2d)
E9Q1D5	0.00283711	1.4334	Tgfb1i1	transforming growth factor beta 1 induced transcript 1(Tgfb1i1)
P14869	0.00502177	1.42625	Rplp0	ribosomal protein, large, P0(Rplp0)
Q61586	0.00502177	1.426	Gpam	glycerol-3-phosphate acyltransferase, mitochondrial(Gpam)
Q8BGI7	0.00235817	1.42325	Lrrc39	leucine rich repeat containing 39(Lrrc39)
A0A5H1ZRL3	0.0281874	1.4215	Nelfb	negative elongation factor complex member B(Nelfb)
Q68FM7	0.000786583	1.4059	Arhgef11	Rho guanine nucleotide exchange factor (GEF) 11(Arhgef11)
O70551	0.00699624	1.39625	Srpk1	serine/arginine-rich protein specific kinase 1(Srpk1)
P47757	0.0085858	1.38089	Capzb	capping actin protein of muscle Z-line subunit beta(Capzb)
G5E8I8	0.00229113	1.358	Cherp	calcium homeostasis endoplasmic reticulum protein(Cherp)
O54917	0.0477229	1.3508	E2f6	E2F transcription factor 6(E2f6)
Q9CZH7	0.0499764	1.34867	Mxra7	matrix-remodelling associated 7(Mxra7)
D3Z6E4	0.0197418	1.32692	Eno2	enolase 2, gamma neuronal(Eno2)
Q810A7	1.36819e-06	1.3217	Ddx42	DEAD box helicase 42(Ddx42)
Q6NZR5	0.0407248	1.31561	Skiv2l	superkiller viralicidic activity 2-like (S. cerevisiae)(Skiv2l)
B7ZP47	0.0194359	1.31559	Wapl	WAPL cohesin release factor(Wapl)
Q8K124	0.0349387	1.312	Plekho2	pleckstrin homology domain containing, family O member 2(Plekho2)
Q8VDP3	0.0109354	1.309	Mical1	microtubule associated monooxygenase, calponin and LIM domain containing 1(Mical1)
O70251	0.00184687	1.304	Eef1b2	eukaryotic translation elongation factor 1 beta 2(Eef1b2)
Q8BH57	0.00303323	1.2955	Wdr48	WD repeat domain 48(Wdr48)
Q62422	0.00205835	1.2798	Ostf1	osteoclast stimulating factor 1(Ostf1)
B2RRE7	0.00128514	1.273	Otud4	OTU domain containing 4(Otud4)
A0A0R4J170	0.00515515	1.2702	Smarca4	SWI/SNF related, matrix associated, actin dependent regulator of chromatin, subfamily a, member 4(Smarca4)
Q65Z40	0.0124207	1.26775	Wapl	WAPL cohesin release factor(Wapl)
Q3UQS2	0.00671567	1.24875	Lsmem1	leucine-rich single-pass membrane protein 1(Lsmem1)
Q8BG05	0.0167856	1.23577	Hnrnpa3	heterogeneous nuclear ribonucleoprotein A3(Hnrnpa3)
Q6A0D4	0.00996495	1.22464	Rftn1	raftlin lipid raft linker 1(Rftn1)
Q91W96	0.000293037	1.2127	Anapc4	anaphase promoting complex subunit 4(Anapc4)
Q9CQZ6	0.02345	0.797252	Ndufb3	NADH:ubiquinone oxidoreductase subunit B3(Ndufb3)
A0A140T8M9	0.00824399	0.792179	Igkv1-122	immunoglobulin kappa chain variable 1-122(Igkv1-122)
A0A286YDB3	0.0215916	0.789983	Tbc1d5	TBC1 domain family, member 5(Tbc1d5)
Q9ESX5	0.0130812	0.765194	Dkc1	dyskeratosis congenita 1, dyskerin(Dkc1)
A2AN08	0.0210393	0.744988	Ubr4	ubiquitin protein ligase E3 component n-recognin 4(Ubr4)
A0A0R4J0I1	0.0354261	0.738206	Serpina3k	serine (or cysteine) peptidase inhibitor, clade A, member 3K(Serpina3k)
P53986	0.0216793	0.731306	Slc16a1	solute carrier family 16 (monocarboxylic acid transporters), member 1(Slc16a1)
Q62234	0.0255959	0.703763	Myom1	myomesin 1(Myom1)
Q91ZJ5	0.0346812	0.671841	Ugp2	UDP-glucose pyrophosphorylase 2(Ugp2)
E9Q8T1	0.0120074	0.670821	Tacc2	transforming, acidic coiled-coil containing protein 2(Tacc2)
O88569	0.0447979	0.627015	Hnrnpa2b1	heterogeneous nuclear ribonucleoprotein A2/B1(Hnrnpa2b1)
D3Z7R0	0.0373448	0.617009	Bckdk	branched chain ketoacid dehydrogenase kinase(Bckdk)
D3YVV9	0.0220223	0.609252	Synpo2	synaptopodin 2(Synpo2)
S4R1M2	0.0474359	0.594343	Safb	scaffold attachment factor B(Safb)
A0A0R4J1P2	0.00290895	0.576041	Tpm3	tropomyosin 3, gamma(Tpm3)
D9J303	0.0388671	0.555665	Pdlim5	PDZ and LIM domain 5(Pdlim5)
A2A8V8	0.0395886	0.545253	Srrm1	serine/arginine repetitive matrix 1(Srrm1)
P15626	0.018317	0.50914	Gstm2	glutathione S-transferase, mu 2(Gstm2)
H7BX88	0.02151	0.476779	Crat	carnitine acetyltransferase(Crat)
A0A1L1STE6	0.0322222	0.418051	Idh3a	isocitrate dehydrogenase 3 (NAD+) alpha(Idh3a)
Q9JK92	0.0488417	0.418	Hspb8	heat shock protein 8(Hspb8)
Q3U3J1	0.0319871	0.412952	Bckdha	branched chain ketoacid dehydrogenase E1, alpha polypeptide(Bckdha)
Q9D0M3	0.0393723	0.4	Cyc1	cytochrome c-1(Cyc1)
A0A140LIG8	0.00467783	0.393449	Xrra1	X-ray radiation resistance associated 1(Xrra1)
Q99LB2	0.0485394	0.389	Dhrs4	dehydrogenase/reductase (SDR family) member 4(Dhrs4)
Q5GIG6	0.0141943	0.385	Tnni3k	TNNI3 interacting kinase(Tnni3k)
Q8R5L1	0.0100789	0.37	C1qbp	complement component 1, q subcomponent binding protein(C1qbp)
Q60994	0.0456636	0.364	Adipoq	adiponectin, C1Q and collagen domain containing(Adipoq)
P70404	0.0245115	0.355195	Idh3g	isocitrate dehydrogenase 3 (NAD+), gamma(Idh3g)
A0A087WQE8	0.0349203	0.344	Kif1a	kinesin family member 1A(Kif1a)
P42125	0.0348192	0.343709	Eci1	enoyl-Coenzyme A delta isomerase 1(Eci1)
